# Supplementary material for: Evidence for compositionally distinct upper mantle plumelets since the early history of the Tristan-Gough hotspot
Source: Springer Nature journal article supplement (doi:10.1038/s41467-023-39585-0), 2023-07-03
Supplement: MOESM3 [file 41467_2023_39585_MOESM3_ESM.pdf]

### **Description of Additional Supplementary Files**

**Supplementary Data:** The file contains the measured Sr-Nd-Pb-Hf isotope ratios of the Rio Grande Rise and Jean Charcot Seamounts, initial and source corrected isotope ratios, as well as standard and sample replicates, and a data compilation of the Tristan-Gough hotspot track.
