# Supplementary material for: Evidence for compositionally distinct upper mantle plumelets since the early history of the Tristan-Gough hotspot
Source: Nat Commun. 2023 Jul 3;14:3908. doi: 10.1038/s41467-023-39585-0 (PMC10318034; doi:10.1038/s41467-023-39585-0)
Supplement: Supplementary file 4 — Supplementary Data [file 41467_2023_39585_MOESM4_ESM.xlsx]

## Sheet: Data
							measured	measured	measured	measured	measured	measured	measured	measured	measured	measured	measured			volatile free	volatile free	volatile free	volatile free	volatile free	volatile free	volatile free	volatile free	volatile free
sample #	location	geochemical affinity	Latitude	Longitude	Dredge depth (mbsl)	Estimated age (Ma)	SiO2	Al2O3	FeO	MnO	MgO	CaO	Na2O	K2O	TiO2	P2O5	L.O.I	SUM		SiO2	Al2O3	FeO	MnO	MgO	CaO	Na2O	K2O	TiO2	Li	Sc	V	Cr	Co	Ni	Cu	Zn	Rb	Sr	Y	Zr	Nb	Mo	Sn	Sb	Cs	Ba	La	Ce	Pr
Eastern Rio Grande Rise
MSM82-6-DR-1	Cruzeiro do Sul Rift	tholeiitic	-34.1561	-30.1525	3311	65	51.92	13.85	11	0.1946	6.45	6.43	3.494	0.44	2.006	0.4424	3.58	99.807		53.9558	14.393	11.4313	0.20223	6.7029	6.68212	3.631	0.457252	2.08465	79.48	42.68	360.2	24.79	38.55	52.13	220.4	172.6	6.497	196.8	23.19	91.22	10.98	0.7144	0.7917	0.5526	0.744	61.44	10.42	23.6	3.224
MSM82-6-DR-2	Cruzeiro do Sul Rift	tholeiitic	-34.1561	-30.1525	3311	65	46.95	15.4	11.9	0.1782	7.376	9.219	3.237	0.5666	1.832	0.3062	2.84	99.805		48.4195	15.882	12.2725	0.183778	7.60687	9.50755	3.33832	0.584335	1.88934	63.03	42.55	389.7	44.63	49.27	62.85	213.7	131.5	44.84	197.7	26.83	94.05	10.11	0.464	0.8193	0.5607	8.195	57.88	9.537	20.57	3.07
MSM82-6-DR-5	Cruzeiro do Sul Rift	tholeiitic	-34.1561	-30.1525	3311	65	47.41	15.04	10.94	0.1608	7.827	9.41	3.052	0.5344	1.939	0.3533	3.12	99.7865		49.0449	15.5586	11.3173	0.166345	8.09691	9.7345	3.15725	0.552829	2.00587	78	45.15	361.1	121.8	39.92	67.32	191.8	102.5	6.283	207.8	24.11	94.69	10.72	0.3277	0.9399	0.229	0.532	57.22	9.912	20.76	3.149
MSM82-6-DR-20	Cruzeiro do Sul Rift	tholeiitic	-34.1561	-30.1525	3311	65	47.19	14.7	11.91	0.1859	7.685	10.39	2.95	0.4277	1.572	0.2215	2.57	99.8021		48.5334	15.1185	12.249	0.191192	7.90377	10.6858	3.03398	0.439875	1.61675	62.17	43.56	347.3	98.99	51.97	76.29	194	127.9	15.47	190.2	24.33	76.19	8.22	0.5903	0.7733	0.3662	2.118	43.5	7.792	16.99	2.584
MSM82-6-DR-42	Cruzeiro do Sul Rift	tholeiitic	-34.1561	-30.1525	3311	65	47.92	16.63	11.21	0.1381	4.822	11.59	2.925	0.7417	1.951	0.3338	1.53	99.7916		48.7678	16.9242	11.4083	0.140543	4.90731	11.795	2.97675	0.754822	1.98552	17.9	37.32	363.4	57.94	45.93	52.37	172.5	84.24	12.98	275.5	26.69	123.7	11.98	0.5983	1.096	0.2699	1.03	143.9	12.5	30.35	3.969
MSM82-7-DR-2	Cruzeiro do Sul Rift	tholeiitic	-34.1658	-30.1636	3870	65	45.69	14.21	12.87	0.1749	6.727	9.507	2.993	0.6202	2.052	0.3319	4.63	99.806		48.0058	14.9302	13.5223	0.183765	7.06796	9.98886	3.1447	0.651635	2.15601	45.53	42.61	411.4	35	44.18	54.66	237.7	119.4	30.68	204	25.9	99.11	12.15	0.4847	1.037	0.6075	5.163	67.29	10.81	25.14	3.55
MSM82-7-DR-4	Cruzeiro do Sul Rift	tholeiitic	-34.1658	-30.1636	3870	65	46.56	13.93	13.96	0.1703	6.8	8.995	3.225	0.7759	2.174	0.335	2.87	99.7952		48.037	14.3719	14.4029	0.175703	7.01572	9.28035	3.32731	0.800514	2.24297	56.91	42.85	414.3	21.65	58.22	55.93	117.8	137.4	11.9	197.4	29.9	101.8	12.7	0.4524	1.038	0.7448	0.6026	71.81	13.11	26.64	3.806
MSM82-10-DR-2	Cruzeiro do Sul Rift	tholeiitic	-33.8014	-30.6972	2109	65	48.06	16.76	10.72	0.1313	4.727	11.5	2.889	0.6539	1.949	0.2953	2.12	99.8055		49.1987	17.1571	10.974	0.134411	4.839	11.7725	2.95745	0.669393	1.99518	14.22	38.18	347.6	60.86	45.41	58.46	160.3	82.76	10.49	269.7	29.81	135.9	12.29	0.6179	1.201	0.2403	0.7032	134.1	12.66	29.04	4.044
MSM82-11-DR-2	Cruzeiro do Sul Rift	tholeiitic	-33.7014	-30.8633	1341	65	42.7	16.2	10.34	0.1333	6.465	12.68	3.296	1.055	2.176	0.3918	4.21	99.6471		44.7415	16.9745	10.8344	0.139673	6.7741	13.2862	3.45358	1.10544	2.28004	67.32	39.42	305	174.9	49.86	83.19	225.7	98.62	21.8	302.8	27.61	160.6	13.24	0.6452	1.33	0.4087	1.606	162.3	16.39	36.85	4.961
MSM82-11-DR-3	Cruzeiro do Sul Rift	tholeiitic	-33.7014	-30.8633	1341	65	44.21	15.88	11.5	0.2189	8.711	9.289	2.491	0.9259	2.042	0.5189	3.92	99.7067		46.1546	16.5785	12.0058	0.228529	9.09416	9.69759	2.60057	0.966627	2.13182	93.65	36.75	297.4	94.84	57.12	117.2	108.8	118.3	21.27	845	29.83	172.9	13.97	2.278	1.422	0.6489	1.629	171	21.38	45.26	5.959
MSM82-11-DR-5	Cruzeiro do Sul Rift	tholeiitic	-33.7014	-30.8633	1341	65	48.06	15.8	10.58	0.147	5.74	11.39	2.958	0.8194	2.03	0.3273	1.94	99.7917		49.1151	16.1469	10.8123	0.150227	5.86602	11.6401	3.02294	0.83739	2.07457	33.1	37.31	316.4	84.24	44.83	46.83	113.4	90.36	13.85	356.8	26.24	166.8	14.03	0.6554	1.385	0.1995	1.102	199.9	20.59	48.98	5.985
MSM82-11-DR-6	Cruzeiro do Sul Rift	tholeiitic	-33.7014	-30.8633	1341	65	46.03	15.99	9.361	0.1291	6.486	11.14	2.764	0.7693	1.965	0.3674	4.77	99.7718		48.4517	16.8313	9.8535	0.135892	6.82724	11.7261	2.90942	0.809774	2.06838	54.85	38.74	318	161.9	52.11	75.95	177.8	89.23	17.71	298.4	27.6	155.4	12.98	0.5596	1.317	0.283	1.287	162.7	15.99	36.39	4.908
MSM82-11-DR-7	Cruzeiro do Sul Rift	tholeiitic	-33.7014	-30.8633	1341	65	47.73	15.94	10.29	0.1334	6.401	11.84	3.24	0.6941	1.743	0.2895	1.46	99.761		48.5549	16.2155	10.4678	0.135706	6.51163	12.0446	3.296	0.706097	1.77313	36.93	40.75	339.9	375	52.94	118.4	126.8	99.11	14.25	451.5	30.84	190.3	14.7	1.094	1.526	0.1966	1.262	240.8	23.26	55.43	6.857
MSM82-11-DR-9	Cruzeiro do Sul Rift	tholeiitic	-33.7014	-30.8633	1341	65	48.31	16.4	8.971	0.107	6.836	11.05	2.851	0.6684	1.71	0.4207	2.4	99.7241		49.6383	16.8509	9.21766	0.109942	7.02395	11.3538	2.92939	0.686777	1.75702	46.02	34.6	272.4	332.6	40.12	103.9	94.83	83.83	11.77	605.7	27.1	158.3	11.58	0.7301	1.285	0.2394	1.05	172.1	17.69	39.83	5.332
MSM82-12-DR-1	Cruzeiro do Sul Rift	tholeiitic	-34.0219	-30.4736	4686	65	46.95	14.78	14.19	0.3216	7.052	5.858	1.65	4.046	1.738	0.4172	2.48	99.4828		48.4007	15.2367	14.6284	0.331537	7.26989	6.039	1.70098	4.17101	1.7917	21.65	33.79	294.1	206.2	40.86	52.01	250.3	206.7	87.42	160.8	21.21	34.9	12.75	0.3149	1.491	0.3499	0.1548	3183	17.23	39.26	4.788
MSM82-13-DR-1	Cruzeiro do Sul Rift	tholeiitic	-34.0006	-30.4714	3706	65	48.89	17.53	11.68	0.1947	6.35	2.541	5.326	0.5442	2.178	0.3534	4.16	99.7473		51.147	18.3393	12.2192	0.203688	6.64314	2.6583	5.57187	0.569322	2.27855	33.32	33.37	320	69.66	49.58	75.2	55.55	166.2	17.57	236.9	27.62	178.6	13.28	0.3948	1.522	0.5245	0.7623	89.23	19.37	46.16	5.958
DSDP Site 516
128-1-23-24	DSDP Site 516	tholeiitic	-30.2765	-35.285		82	49.27	13.6	12.47	0.1815	5.317	10.11	2.728	0.3495	2.162	0.3218	3.28	99.7898		51.0518	14.0918	12.921	0.188064	5.50929	10.4756	2.82666	0.362139	2.24019	5.354	41.73	412	42.84	42.66	48.73	243.1	119.6	9.111	266.9	34.29	164.7	10.96	0.7682	1.427	0.0383	0.238	144.7	15.31	36.75	4.941
128-1-58-59	DSDP Site 516	tholeiitic	-30.2765	-35.285		82	48.71	13.45	12.77	0.1704	5.346	9.815	2.92	0.3203	2.106	0.308	3.87	99.7857		50.7842	14.0227	13.3138	0.177656	5.57364	10.2329	3.04434	0.333939	2.19568	6.172	40.84	397.1	37.32	49.68	49.91	240.1	113.5	7.787	268.5	34.2	168.8	11.12	0.7388	1.454	0.03556	0.2409	160	15.24	37.26	5.029
128-1-124-125	DSDP Site 516	tholeiitic	-30.2765	-35.285		82	48.37	13.53	12.8	0.1757	5.288	10.01	2.696	0.3146	2.107	0.4871	4	99.7784		50.502	14.1264	13.3642	0.183444	5.52108	10.4512	2.81483	0.328467	2.19987	5.302	41.55	409	38.27	50.28	49.99	236.2	108.7	7.509	271.1	33.37	166.1	10.81	0.7348	1.411	0.0274	0.2001	176.7	15.22	36.76	4.903
128-2-26-27	DSDP Site 516	tholeiitic	-30.2765	-35.285		82	48.02	13.4	13.29	0.2041	5.416	9.866	2.79	0.3337	2.107	0.3142	4.04	99.781		50.1562	13.9961	13.8812	0.213179	5.65693	10.3049	2.91411	0.348545	2.20073	5.938	41.86	410.9	40.97	51.71	52.23	245.1	104.7	8.809	269.6	34.86	164.9	11.15	0.7935	1.438	0.0277	0.2278	157.1	15.55	37.26	5.008
128-2-37-38	DSDP Site 516	tholeiitic	-30.2765	-35.285		82	48.36	13.67	12.96	0.1758	5.31	9.89	2.789	0.3383	2.064	0.3124	3.91	99.7795		50.4436	14.259	13.5184	0.183374	5.53878	10.3161	2.90916	0.352876	2.15293	5.744	40.8	396.9	41.8	49.17	51	243	105.3	8.899	266.5	34.78	167.5	11.08	0.7444	1.457	0.02603	0.2188	138.6	15.71	37.4	5.009
Western Rio Grande Rise
MSM82-27-DR-2	Cruzeiro do Sul Rift	alkalic	-31.0692	-34.4228	1412	50	40.12	13.44	10.94	0.1879	10.78	11.42	2.444	2.866	2.522	1.046	3.72	99.4859		41.8938	14.0342	11.4237	0.196208	11.2566	11.9249	2.55206	2.99271	2.63351	23.02	27.17	255	466.6	47.89	221.8	45.49	76.94	63.86	1322	27.4	317.2	110.9	4.682	1.901	0.1559	0.7687	882.4	110.3	206.7	22.99
MSM82-34-DR-3-B	Cruzeiro do Sul Rift	alkalic	-30.865	-35.3928	1095	50	46.51	18.2	8.016	0.1496	4.612	7.135	3.583	3.188	2.53	1.079	4.55	99.5526		48.9566	19.1574	8.43766	0.157469	4.8546	7.51032	3.77148	3.3557	2.66309	76.65	8.985	161.8	2.321	19.48	17.01	15.4	91.29	45.19	1279	30.69	435.4	89.58	2.273	2.51	0.3272	1.409	1478	99.51	199.5	21.48
MSM82-34-DR-3-C	Cruzeiro do Sul Rift	alkalic	-30.865	-35.3928	1095	50	47.14	15.33	11.09	0.163	5.288	8.01	3.284	3.027	3.086	0.7874	2.43	99.6354		48.4952	15.7707	11.4088	0.167686	5.44003	8.24028	3.37841	3.11402	3.17472	85.28	21.75	337.6	64.45	43.22	70.1	45.91	99.62	61.89	784	26.42	316.4	49.88	1.909	2.226	0.1685	0.5479	979.1	52.92	127.1	14.17
MSM82-55-DR-2	Cruzeiro do Sul Rift	alkalic	-30.4114	-36.33	1287	50	50.17	16.64	7.11	0.2455	2.897	4.906	3.498	6.039	2.233	1.025	4.81	99.5735		52.9423	17.5595	7.50289	0.259066	3.05708	5.1771	3.69129	6.37271	2.35639	12.49	9.225	164.6	2.651	40.87	34.9	15.17	93.21	126.4	823.3	22.35	434	69.04	2.036	2.547	1.055	1.848	1498	84.12	168.5	19.16
MSM82-55-DR-14	Cruzeiro do Sul Rift	alkalic	-30.4114	-36.33	1287	50	55.15	19.23	5.709	0.07799	1.128	2.981	4.907	5.089	1.438	0.751	3.07	99.531		57.1734	19.9355	5.91845	0.0808513	1.16938	3.09037	5.08703	5.27571	1.49076	4.629	2.811	39.41	5.595	4.647	5.38	7.24	77.43	104.2	1139	25.07	530.2	89.06	0.471	2.855	0.313	0.667	1919	101.6	208.8	21.15
MSM82-57-DR-1	Cruzeiro do Sul Rift	alkalic	-30.3556	-36.0769	1116	50	52.21	17.54	7.141	0.1073	3.032	5.512	3.92	4.849	2.189	0.8134	2.29	99.6037		53.6512	18.0242	7.33812	0.110262	3.1157	5.66416	4.02821	4.98285	2.24943	28.09	9.59	157.3	8.162	19.6	15.55	25.8	83.11	92.04	995.4	27.25	457.8	65.18	1.367	2.756	0.1418	1.179	1417	85.68	174.3	19.32
MSM82-58-DR-1	Cruzeiro do Sul Rift	alkalic	-30.1169	-36.3528	1505	50	47.73	11.25	10.34	0.1215	10.76	7.57	2.357	3.018	2.723	0.7059	2.96	99.5354		49.4225	11.6489	10.7067	0.125808	11.1416	7.83844	2.44058	3.12502	2.81956	53.21	20.85	237.9	847.4	53.14	447.2	59.54	124	51.11	483.7	19.31	361.9	41.76	1.688	2.182	0.6468	0.2972	709.7	55.31	113.9	13.97
MSM82-58-DR-2	Cruzeiro do Sul Rift	alkalic	-30.1169	-36.3528	1505	50	44.44	11.51	11.39	0.1382	10.74	7.305	2.952	3.807	2.778	0.8773	3.56	99.4975		46.3218	11.9974	11.8723	0.144052	11.1948	7.61433	3.077	3.96821	2.89564	53.77	21.42	243	848.7	59.4	496.5	79.22	111.1	54.52	494	20.68	386.9	44.04	2.009	2.308	1.25	0.5511	973.2	60.98	127.1	15.29
MSM82-58-DR-3	Cruzeiro do Sul Rift	alkalic	-30.1169	-36.3528	1505	50	46.75	11.94	10.61	0.1412	10.29	6.418	2.819	3.281	2.686	0.894	3.69	99.5192		48.7847	12.4597	11.0718	0.147345	10.7379	6.69733	2.94169	3.4238	2.8029	45.28	20.21	232.9	785.2	59.73	466.6	76.58	107.8	49.95	423.2	20.63	372.4	42.21	2.107	2.257	1.332	0.8762	862.3	50.82	122.9	14.82
MSM82-58-DR-4	Cruzeiro do Sul Rift	alkalic	-30.1169	-36.3528	1505	50	47.93	11.54	10.5	0.2221	9.14	6.905	2.123	4.794	3.307	0.905	2.01	99.3761		49.2266	11.8522	10.784	0.228108	9.38725	7.09179	2.18043	4.92368	3.39646	43.65	18.91	248	614.6	79.33	431	106.3	132.3	70.05	1133	23.89	445.5	47.11	2.091	3.054	0.9995	0.1856	1438	72.06	143.3	17.18
Jean Charcot Seamount Chain
MSM82-60-DR-1	Guyot-like	alkalic	-29.6736	-37.0061	1952	90	46.51	13.16	11.54	0.1673	8.73	10.32	2.628	2.162	2.627	0.6835	1.02	99.5478		47.205	13.3566	11.7124	0.1698	8.86044	10.4742	2.66727	2.1943	2.66625	19.25	24.17	284	436.3	46.5	140.9	57.94	84.11	31.83	1034	21.59	274.6	45.86	1.947	1.921	0.06012	0.4546	981.1	56.05	125.9	14.35
MSM82-60-DR-2	Guyot-like	alkalic	-29.6736	-37.0061	1952	90	44.5	13.2	11.84	0.1814	9.367	10.1	2.761	1.411	2.587	0.7177	2.89	99.5551		46.0352	13.6554	12.2485	0.187658	9.69016	10.4484	2.85625	1.45968	2.67625	96.67	27	309.6	478.3	54.44	259.5	56.38	179.7	15.75	951.6	27.2	132.4	42.16	0.7291	1.787	0.5877	0.7486	782.4	54.21	112.2	13.46
MSM82-65-DR-1	Ridge-like	alkalic	-28.6175	-37.4339	3193	90	43.27	11.21	8.254	0.1894	5.849	13.72	2.014	4.605	2.688	0.8461	6.82	99.4655		46.7049	12.0999	8.90923	0.204435	6.31331	14.8091	2.17388	4.97056	2.90138	22.87	25.03	233.7	505.5	40.88	107.2	81.31	80.63	93.38	1061	19.65	209.8	62.68	1.041	2.32	1.064	0.6414	1718	88.96	186	20.16
MSM82-65-DR-2	Ridge-like	alkalic	-28.6175	-37.4339	3193	90	41.57	10.89	12.55	0.1411	12.57	10.7	1.172	1.284	2.568	0.809	5.26	99.5141		44.1042	11.5539	13.3151	0.149702	13.3363	11.3523	1.24345	1.36227	2.72455	112.4	29.36	283.1	978.2	76.06	444.4	82.24	110.9	24.82	392.6	19.7	139.8	43.79	2.028	2.015	0.7472	0.8625	860.7	53.19	113	13.03
MSM82-72-DR-3	Guyot-like with superimposed cone	alkalic	-27.3503	-39.0769	2260	90	41.88	12.12	11.5	0.2273	10.73	11.76	1.656	3.258	2.557	0.858	2.93	99.4763		43.3782	12.5536	11.9114	0.235431	11.1138	12.1807	1.71524	3.37455	2.64847	12.6	34.91	415.3	786.3	59.4	209	48.78	129.5	156.9	1018	33.44	217	109.1	0.4263	2.239	0.241	1.276	2411	119.7	236.6	25.94
MSM82-72-DR-4	Guyot-like with superimposed cone	alkalic	-27.3503	-39.0769	2260	90	45.7	18.53	9.025	0.1634	5.097	7.924	2.577	2.715	2.192	0.7672	4.83	99.5206		48.2624	19.569	9.53104	0.172562	5.38279	8.36831	2.7215	2.86723	2.31491	27.48	14.23	240.1	49.02	21.32	46.62	51.32	120.5	53.2	1341	26.85	264.1	127.4	0.8281	1.799	0.5426	1.349	1223	110.9	210.9	21.34
MSM82-76-DR-1	Guyot-like	alkalic	-26.2397	-39.4989	2894	90	43.1	9.909	14.61	0.1864	13.02	10.35	1.746	0.9826	2.69	0.6177	2.29	99.5017		44.3362	10.1932	15.0291	0.191746	13.3934	10.6469	1.79608	1.01078	2.76716	32.38	32.27	300.9	1123	79.74	432.6	74.14	121.8	15.11	722.7	21.61	107.3	47.88	2.882	1.668	0.9385	0.4168	398.7	39.94	90.44	10.88
MSM82-76-DR-2	Guyot-like with superimposed cone	alkalic	-26.2397	-39.4989	2894	90	43.28	12.03	12.99	0.157	7.98	10.35	3.219	1.308	3.571	0.939	3.74	99.564		45.1661	12.5543	13.5561	0.163842	8.32777	10.8011	3.35928	1.365	3.72662	74.66	22.62	296.7	445	67.41	319.5	58.89	184.2	16.07	875.3	28.84	159.4	69.09	1.933	2.34	0.5454	2.929	625.8	62.65	134.9	16.36
MSM82-80-DR-1	Guyot-like with superimposed cone	alkalic	-26.3478	-40.0189	2671	90	43.35	14.42	9.679	0.232	4.333	12.17	2.294	2.168	4.147	0.9213	5.8	99.5143		46.2576	15.3872	10.3282	0.247561	4.62363	12.9863	2.44787	2.31341	4.42515	7.024	17.97	294.3	83.93	44.07	58.89	109.5	104.8	32.09	1297	26.87	297	89.86	5.103	2.711	0.1416	0.843	888.1	79.66	141.7	19.56
Major and trace element data were previously reported by Hoyer et al. (2022)
Hoyer, P.A., Haase, K.M., Regelous, M., O’Connor, J.M., Homrighausen, S., Geissler, W.H. and Jokat, W. (2022) Mantle plume and rift-related volcanism during the evolution of the Rio Grande Rise. Communications Earth & Environment 3, 18.
[truncated: 55 more columns]

## Sheet: Standards and Sample Replicates
Sample No	Lab. No / Reference	leaching method	87Sr/86Sr	2SE	143Nd/144Nd	2SE	204Pb/206Pb	2SE	207Pb/206Pb	2SE	208Pb/206Pb	2SE	206Pb/204Pb	2SE	207Pb/204Pb	2SE	208Pb/204Pb	2SE	176Hf/177Hf	2SE
Leaching
Standard			NBS987		La Jolla		NBS981		NBS981		NBS981		NBS981		NBS981		NBS981		SPEX
AVRG			0.71025		0.51185		0.0590291		0.914799		2.16758		16.9408		15.4974		36.7206		0.28217
2SD			5.53233e-06		6.56009e-06		6.35153e-06		4.85199e-05		9.44673e-05		0.00182278		0.00187378		0.0047978		4.37496e-06
N			24		26		257		257		257		257		257		257		69
Reference Material
BCR-2	Fourny et al. (2016)	Sr-Nd-Hf unleached, Pb leached	0.705006	7.32323e-06	0.512643	1.4e-05							18.7988	0.00268132	15.6235	0.00281736	38.8281	0.00994496	0.282869	1.44151e-05
BCR-2	A14	2M HCL_70C_2hrs	0.704998	5.2e-06	0.512628	5.2e-06	0.0531833	2.62244e-06	0.830927	1.15631e-05	2.06481	4.1873e-05	18.8029	0.000922881	15.6238	0.000865714	38.8245	0.00236948
BCR-2	J21	2M HCL_70C_2hrs	0.704997	5.75404e-06	0.512629	4.99686e-06	0.0531779	2.82285e-06	0.830928	8.79072e-06	2.0649	1.90683e-05	18.8048	0.000992502	15.6254	0.000845486	38.8301	0.00210364
BCR-2	J21	2M HCL_70C_2hrs			0.512631	4.79722e-06	0.0531829	2.36911e-06	0.830939	1.27172e-05	2.06492	6.05446e-05	18.803	0.000833448	15.6242	0.000808768	38.8267	0.00255829
BCR-2	J21	2M HCL_70C_2hrs			0.512629	5.09521e-06
BCR-2	N20	2M HCL_70C_2hrs																	0.282868	2.74964e-06
BCR-2	S6	2M HCL_70C_2hrs																	0.28287	3.4242e-06
BCR-2	C15	2M HCL_70C_2hrs	0.705008	1.29017e-06	0.512632	4.99231e-06	0.0531869	1.88674e-06	0.830918	1.10875e-05	2.06479	5.23561e-05	18.8016	0.000663674	15.6226	0.00064093	38.8213	0.00205808	0.282871	3.78021e-06
BCR-2	C16	2M HCL_70C_2hrs	0.705	4.03122e-06	0.512629	5.11948e-06	0.053189	6.92142e-06	0.830954	2.77983e-05	2.06482	0.000136733	18.8009	0.00243821	15.6227	0.00229376	38.8205	0.00623888	0.282875	2.49707e-06
BCR-2	C17	2M HCL_70C_2hrs																	0.282871	3.82767e-06
Sample Replicates
MSM82-10-DR-2	A5	chips_2M HCL_70C_2hrs	0.704232	4e-06	0.512686	5.4e-06	0.0561071	2.44509e-06	0.867994	1.37057e-05	2.14794	6.13423e-05	17.823	0.0007725	15.4703	0.000789126	38.2829	0.00248588
MSM82-10-DR-2	A7	chips_2M HCL_70C_2hrs	0.704225	5.2e-06	0.512682	4.8e-06	0.0561048	3.51522e-06	0.867918	1.29087e-05	2.14798	5.41503e-05	17.8238	0.00111072	15.4696	0.00107701	38.2851	0.00292416
MSM82-10-DR-2	A12	powder_2M HCL_70C_2hrs	0.704228	5.4e-06	0.512694	5.2e-06	0.0556711	2.58687e-06	0.862614	1.65939e-05	2.13627	7.90739e-05	17.9626	0.000830365	15.4948	0.000777428	38.373	0.00250731
MSM82-10-DR-2	A19	powder_6M HCL_130C_3hrs	0.704238	5e-06	0.512686	4.2e-06
MSM82-12-DR-1	J9	Nd+Pb+Hf, chips_2M HCL_70C_1hrs Sr, powder_6M HCl_130C_3hrs	0.70668	5e-06	0.512418	5.20154e-06	0.0567744	4.48478e-06	0.876651	1.55411e-05	2.18257	6.02078e-05	17.6136	0.00138473	15.441	0.00131688	38.4428	0.00340872
MSM82-12-DR-1	J20	Nd+Pb+Hf, chips_2M HCL_70C_1hrs Sr, powder_6M HCl_130C_3hrs	0.705286	4.4e-06	0.512415	5.00371e-06	0.0566538	5.56127e-06	0.874858	1.87304e-05	2.18099	5.93654e-05	17.6511	0.00172109	15.4422	0.00151842	38.4968	0.00369612
MSM82-60-DR-1	K6	Nd+Pb+Hf, chips_2M HCL_70C_1hrs Sr, powder_6M HCl_130C_3hrs	0.705539	5e-06	0.512302	4.32285e-06	0.0566385	5.60151e-06	0.875272	2.34434e-05	2.1478	0.000115064	17.6558	0.00173681	15.4537	0.00182925	37.9212	0.00540632	0.282591	3.00677e-06
MSM82-60-DR-1	K20	Nd+Pb+Hf, chips_2M HCL_70C_1hrs Sr, powder_6M HCl_130C_3hrs			0.512301	5.58099e-06	0.0566261	2.71021e-06	0.875209	8.98145e-06	2.14764	2.96724e-05	17.6597	0.000840334	15.4559	0.000791923	37.9267	0.00198913	0.282592	2.34656e-06
MSM82-65-DR-2	K9	Nd+Pb+Hf, chips_2M HCL_70C_1hrs Sr, powder_6M HCl_130C_3hrs	0.70556	4.6e-06	0.512347	4.95802e-06	0.0566726	4.14244e-06	0.876041	2.28831e-05	2.15383	0.000108105	17.6452	0.0012843	15.4579	0.00136215	38.0047	0.00416919
MSM82-65-DR-2	K20	Sr, powder_6M HCL_130C_3hrs	0.705541	4.8e-06
Fourny, A., Weis, D., and Scoates, J. S., 2016, Comprehensive Pb-Sr-Nd-Hf isotopic, trace element, and mineralogical characterization of mafic to ultramafic rock reference materials: Geochemistry, Geophysics, Geosystems, v. 17, no. 3, p. 739-773. Note that associated errors are 2SD based on 7, 10 and 11 digestions for Sr, Nd and Hf respectively for unleached BCR-2 while 2SD errors for Pb are base…

## Sheet: Data Compilation
Sample ID	Location	Reference(s)	Geochemical affinity1	Lat	Long	Age (Ma)*	SiO2	Al2O3	FeOT	MnO	MgO	CaO	Na2O	K2O	TiO2	P2O5	SO3	L.O.I	SUM(volatile free)		Li	Sc	V	Cr	Co	Ni	Cu	Zn	Ga	Rb	Sr	Y	Zr	Nb	Mo	Sn	Sb	Cs	Ba	La	Ce	Pr	Nd	Sm	Eu	Gd	Tb	Dy	Ho
Eastern Rio Grande Rise
MSM82-6-DR-1	ERGR	Hoyer et al. (2022) and this study	tholeiitic	-34.1561	-30.1525	65	51.92	13.85	11	0.1946	6.45	6.43	3.494	0.44	2.006	0.4424		3.58	96.227		79.48	42.68	360.2	24.79	38.55	52.13	220.4	172.6		6.497	196.8	23.19	91.22	10.98	0.7144	0.7917	0.5526	0.744	61.44	10.42	23.6	3.224	14.85	3.97	1.471	4.562	0.7514	4.851	0.9725
MSM82-6-DR-2	ERGR	Hoyer et al. (2022) and this study	tholeiitic	-34.1561	-30.1525	65	46.95	15.4	11.9	0.1782	7.376	9.219	3.237	0.5666	1.832	0.3062		2.84	96.965		63.03	42.55	389.7	44.63	49.27	62.85	213.7	131.5		44.84	197.7	26.83	94.05	10.11	0.464	0.8193	0.5607	8.195	57.88	9.537	20.57	3.07	14.27	3.989	1.479	4.679	0.7915	5.093	1.061
MSM82-6-DR-5	ERGR	Hoyer et al. (2022) and this study	tholeiitic	-34.1561	-30.1525	65	47.41	15.04	10.94	0.1608	7.827	9.41	3.052	0.5344	1.939	0.3533		3.12	96.6665		78	45.15	361.1	121.8	39.92	67.32	191.8	102.5		6.283	207.8	24.11	94.69	10.72	0.3277	0.9399	0.229	0.532	57.22	9.912	20.76	3.149	14.5	3.88	1.441	4.423	0.7307	4.691	0.9633
MSM82-6-DR-20	ERGR	Hoyer et al. (2022) and this study	tholeiitic	-34.1561	-30.1525	65	47.19	14.7	11.91	0.1859	7.685	10.39	2.95	0.4277	1.572	0.2215		2.57	97.2321		62.17	43.56	347.3	98.99	51.97	76.29	194	127.9		15.47	190.2	24.33	76.19	8.22	0.5903	0.7733	0.3662	2.118	43.5	7.792	16.99	2.584	12.22	3.469	1.315	4.191	0.7128	4.628	0.9685
MSM82-6-DR-48	ERGR	Hoyer et al. (2022)	tholeiitic	-34.1561	-30.1525	65	46.89	14.37	13.57	0.1695	6.65	8.769	3.399	0.7732	2.107	0.4134		2.69	97.1111		56.66	43.69	421.8	24.88	37.68	35.02	183.2	130.4		18.52	191.5	30.09	105.6	12.37	0.3535	1.055	0.5193	1.503	96.97	10.2	23.09	3.341	15.55	4.388	1.614	5.233	0.8913	5.815	1.211
MSM82-6-DR-42	ERGR	Hoyer et al. (2022) and this study	tholeiitic	-34.1561	-30.1525	65	47.92	16.63	11.21	0.1381	4.822	11.59	2.925	0.7417	1.951	0.3338		1.53	98.2616		17.9	37.32	363.4	57.94	45.93	52.37	172.5	84.24		12.98	275.5	26.69	123.7	11.98	0.5983	1.096	0.2699	1.03	143.9	12.5	30.35	3.969	17.88	4.66	1.713	5.184	0.8553	5.478	1.098
MSM82-7-DR-2	ERGR	Hoyer et al. (2022) and this study	tholeiitic	-34.1658	-30.1636	65	45.69	14.21	12.87	0.1749	6.727	9.507	2.993	0.6202	2.052	0.3319		4.63	95.176		45.53	42.61	411.4	35	44.18	54.66	237.7	119.4		30.68	204	25.9	99.11	12.15	0.4847	1.037	0.6075	5.163	67.29	10.81	25.14	3.55	16.54	4.453	1.639	5.146	0.8438	5.414	1.086
MSM82-7-DR-4	ERGR	Hoyer et al. (2022) and this study	tholeiitic	-34.1658	-30.1636	65	46.56	13.93	13.96	0.1703	6.8	8.995	3.225	0.7759	2.174	0.335		2.87	96.9252		56.91	42.85	414.3	21.65	58.22	55.93	117.8	137.4		11.9	197.4	29.9	101.8	12.7	0.4524	1.038	0.7448	0.6026	71.81	13.11	26.64	3.806	17.38	4.66	1.701	5.591	0.9458	6.173	1.265
MSM82-10-DR-1	ERGR	Hoyer et al. (2022)	tholeiitic	-33.8014	-30.6972	65	48.86	14.63	12.97	0.1922	5.401	10.84	2.968	0.7399	2.16	0.3542		0.68	99.1153		23.01	42.64	403.3	59.78	55.52	52.55	174.5	98.38		17.12	251.2	30.3	130.8	12.92	0.8364	1.237	0.3574	1.615	139.8	13.49	33.12	4.318	19.43	5.125	1.874	5.813	0.9748	6.266	1.266
MSM82-10-DR-2	ERGR	Hoyer et al. (2022) and this study	tholeiitic	-33.8014	-30.6972	65	48.06	16.76	10.72	0.1313	4.727	11.5	2.889	0.6539	1.949	0.2953		2.12	97.6855		14.22	38.18	347.6	60.86	45.41	58.46	160.3	82.76		10.49	269.7	29.81	135.9	12.29	0.6179	1.201	0.2403	0.7032	134.1	12.66	29.04	4.044	18.49	4.887	1.768	5.54	0.9229	5.892	1.21
MSM82-10-DR-3	ERGR	Hoyer et al. (2022)	tholeiitic	-33.8014	-30.6972	65	48.24	14.87	11.05	0.1883	5.716	10.23	3.098	0.778	2.264	0.3898		2.98	96.8241		34.47	42.44	381.5	54.87	43.12	40.93	194.7	110		25.16	248.4	33.65	161.4	14.06	0.5354	1.434	0.3912	2.025	128.8	13.82	32.34	4.583	21.11	5.684	2.013	6.388	1.059	6.7	1.362
MSM82-10-DR-4	ERGR	Hoyer et al. (2022)	tholeiitic	-33.8014	-30.6972	65	48.38	14.41	12.9	0.1759	5.72	11.13	2.987	0.7071	2.134	0.329		0.92	98.873		14.67	42.06	394	67.5	50.19	58.15	183.4	94.93		12.37	245.1	30.1	131.3	12.71	0.6066	1.218	0.1074	0.9687	150.6	13.47	32.44	4.253	19.33	5.116	1.843	5.84	0.9669	6.246	1.256
MSM82-11-DR-1	ERGR	Hoyer et al. (2022)	tholeiitic	-33.7014	-30.8633	65	45.12	15.74	10.32	0.1378	6.673	13.15	2.952	0.9126	2.02	0.343		2.37	97.3684		48.81	37.69	310	162.4	45.17	66.26	181.5	87.45		17.18	302.7	27.49	149.7	12.56	0.5057	1.241	0.2094	0.9695	153.6	16.01	35.6	4.759	20.83	5.073	1.779	5.386	0.8653	5.402	1.091
MSM82-11-DR-2	ERGR	Hoyer et al. (2022) and this study	tholeiitic	-33.7014	-30.8633	65	42.7	16.2	10.34	0.1333	6.465	12.68	3.296	1.055	2.176	0.3918		4.21	95.4371		67.32	39.42	305	174.9	49.86	83.19	225.7	98.62		21.8	302.8	27.61	160.6	13.24	0.6452	1.33	0.4087	1.606	162.3	16.39	36.85	4.961	21.82	5.33	1.87	5.698	0.9109	5.658	1.136
MSM82-11-DR-3	ERGR	Hoyer et al. (2022) and this study	tholeiitic	-33.7014	-30.8633	65	44.21	15.88	11.5	0.2189	8.711	9.289	2.491	0.9259	2.042	0.5189		3.92	95.7867		93.65	36.75	297.4	94.84	57.12	117.2	108.8	118.3		21.27	845	29.83	172.9	13.97	2.278	1.422	0.6489	1.629	171	21.38	45.26	5.959	25.66	5.915	2.007	6.087	0.9487	5.826	1.153
MSM82-11-DR-4	ERGR	Hoyer et al. (2022)	tholeiitic	-33.7014	-30.8633	65	47.33	15.72	10.51	0.1518	6.288	10.85	2.667	0.8418	1.952	0.3935		3.11	96.7041		41.52	36.68	301.8	88.74	44.87	51.06	93.03	92.99		17.87	357.1	28.27	170.1	13.72	0.617	1.41	0.2767	1.364	166.5	19.84	44.14	5.801	24.8	5.807	1.977	5.888	0.9263	5.693	1.131
MSM82-11-DR-5	ERGR	Hoyer et al. (2022) and this study	tholeiitic	-33.7014	-30.8633	65	48.06	15.8	10.58	0.147	5.74	11.39	2.958	0.8194	2.03	0.3273		1.94	97.8517		33.1	37.31	316.4	84.24	44.83	46.83	113.4	90.36		13.85	356.8	26.24	166.8	14.03	0.6554	1.385	0.1995	1.102	199.9	20.59	48.98	5.985	25.57	5.872	2.02	5.919	0.9243	5.672	1.098
MSM82-11-DR-6	ERGR	Hoyer et al. (2022) and this study	tholeiitic	-33.7014	-30.8633	65	46.03	15.99	9.361	0.1291	6.486	11.14	2.764	0.7693	1.965	0.3674		4.77	95.0018		54.85	38.74	318	161.9	52.11	75.95	177.8	89.23		17.71	298.4	27.6	155.4	12.98	0.5596	1.317	0.283	1.287	162.7	15.99	36.39	4.908	21.52	5.258	1.831	5.622	0.8989	5.579	1.122
MSM82-11-DR-7	ERGR	Hoyer et al. (2022) and this study	tholeiitic	-33.7014	-30.8633	65	47.73	15.94	10.29	0.1334	6.401	11.84	3.24	0.6941	1.743	0.2895		1.46	98.301		36.93	40.75	339.9	375	52.94	118.4	126.8	99.11		14.25	451.5	30.84	190.3	14.7	1.094	1.526	0.1966	1.262	240.8	23.26	55.43	6.857	29.27	6.833	2.385	6.818	1.073	6.582	1.275
MSM82-11-DR-8	ERGR	Hoyer et al. (2022)	tholeiitic	-33.7014	-30.8633	65	46.11	17.12	10.4	0.1037	6.318	11.06	2.416	0.7958	1.595	0.3006		3.58	96.2191		56.42	34.19	293.3	146.2	52.74	116.3	114.4	78.91		22.41	283.7	19.32	87.77	9.237	0.4861	0.842	0.2493	1.72	86.94	8.015	18.63	2.686	12.55	3.419	1.312	3.836	0.6242	3.917	0.792
MSM82-11-DR-9	ERGR	Hoyer et al. (2022) and this study	tholeiitic	-33.7014	-30.8633	65	48.31	16.4	8.971	0.107	6.836	11.05	2.851	0.6684	1.71	0.4207		2.4	97.3241		46.02	34.6	272.4	332.6	40.12	103.9	94.83	83.83		11.77	605.7	27.1	158.3	11.58	0.7301	1.285	0.2394	1.05	172.1	17.69	39.83	5.332	23.2	5.57	1.923	5.756	0.9113	5.597	1.117
MSM82-12-DR-1	ERGR	Hoyer et al. (2022) and this study	tholeiitic	-34.0219	-30.4736	65	46.95	14.78	14.19	0.3216	7.052	5.858	1.65	4.046	1.738	0.4172		2.48	97.0028		21.65	33.79	294.1	206.2	40.86	52.01	250.3	206.7		87.42	160.8	21.21	34.9	12.75	0.3149	1.491	0.3499	0.1548	3183	17.23	39.26	4.788	20.19	4.633	1.513	4.815	0.7588	4.678	0.897
MSM82-13-DR-1	ERGR	Hoyer et al. (2022) and this study	tholeiitic	-34.0006	-30.4714	65	48.89	17.53	11.68	0.1947	6.35	2.541	5.326	0.5442	2.178	0.3534		4.16	95.5873		33.32	33.37	320	69.66	49.58	75.2	55.55	166.2		17.57	236.9	27.62	178.6	13.28	0.3948	1.522	0.5245	0.7623	89.23	19.37	46.16	5.958	25.62	5.894	1.97	5.899	0.9211	5.675	1.134
Western Rio Grande Rise
MSM82-27-DR-2	WRGR	Hoyer et al. (2022) and this study	alkaline	-31.0692	-34.4228	50	40.12	13.44	10.94	0.1879	10.78	11.42	2.444	2.866	2.522	1.046		3.72	95.7659		23.02	27.17	255	466.6	47.89	221.8	45.49	76.94		63.86	1322	27.4	317.2	110.9	4.682	1.901	0.1559	0.7687	882.4	110.3	206.7	22.99	84.11	12.61	3.654	9.044	1.171	6.226	1.106
MSM82-34-DR-3-B	WRGR	Hoyer et al. (2022) and this study	alkaline	-30.865	-35.3928	50	46.51	18.2	8.016	0.1496	4.612	7.135	3.583	3.188	2.53	1.079		4.55	95.0026		76.65	8.985	161.8	2.321	19.48	17.01	15.4	91.29		45.19	1279	30.69	435.4	89.58	2.273	2.51	0.3272	1.409	1478	99.51	199.5	21.48	80.2	12.93	3.829	9.965	1.342	7.399	1.332
MSM82-34-DR-3-C	WRGR	Hoyer et al. (2022) and this study	alkaline	-30.865	-35.3928	50	47.14	15.33	11.09	0.163	5.288	8.01	3.284	3.027	3.086	0.7874		2.43	97.2054		85.28	21.75	337.6	64.45	43.22	70.1	45.91	99.62		61.89	784	26.42	316.4	49.88	1.909	2.226	0.1685	0.5479	979.1	52.92	127.1	14.17	54.52	9.807	2.988	7.89	1.103	6.065	1.093
MSM82-55-DR-1	WRGR	Hoyer et al. (2022)	alkaline	-30.4114	-36.33	50	51.56	17.7	5.491	0.1144	2.27	4.957	4.036	5.717	1.815	1.109		4.79	94.7694		15.67	6.322	121.9	2.657	6.147	21.1	9.13	86.43		102.3	897.1	27.06	413.2	66.97	1.024	2.746	1.086	0.5938	1774	100.1	202.5	22.34	83.33	12.88	3.648	9.31	1.211	6.56	1.162
MSM82-55-DR-2	WRGR	Hoyer et al. (2022) and this study	alkaline	-30.4114	-36.33	50	50.17	16.64	7.11	0.2455	2.897	4.906	3.498	6.039	2.233	1.025		4.81	94.7635		12.49	9.225	164.6	2.651	40.87	34.9	15.17	93.21		126.4	823.3	22.35	434	69.04	2.036	2.547	1.055	1.848	1498	84.12	168.5	19.16	71.45	11.11	3.089	8.199	1.103	6.068	1.117
MSM82-55-DR-14	WRGR	Hoyer et al. (2022) and this study	alkaline	-30.4114	-36.33	50	55.15	19.23	5.709	0.07799	1.128	2.981	4.907	5.089	1.438	0.751		3.07	96.461		4.629	2.811	39.41	5.595	4.647	5.38	7.24	77.43		104.2	1139	25.07	530.2	89.06	0.471	2.855	0.313	0.667	1919	101.6	208.8	21.15	71.53	10.03	3.557	6.805	0.9506	5.322	0.9922
MSM82-57-DR-1	WRGR	Hoyer et al. (2022) and this study	alkaline	-30.3556	-36.0769	50	52.21	17.54	7.141	0.1073	3.032	5.512	3.92	4.849	2.189	0.8134		2.29	97.3137		28.09	9.59	157.3	8.162	19.6	15.55	25.8	83.11		92.04	995.4	27.25	457.8	65.18	1.367	2.756	0.1418	1.179	1417	85.68	174.3	19.32	71.98	11.57	3.33	8.5	1.144	6.266	1.114
MSM82-58-DR-1	WRGR	Hoyer et al. (2022) and this study	alkaline	-30.1169	-36.3528	50	47.73	11.25	10.34	0.1215	10.76	7.57	2.357	3.018	2.723	0.7059		2.96	96.5754		53.21	20.85	237.9	847.4	53.14	447.2	59.54	124		51.11	483.7	19.31	361.9	41.76	1.688	2.182	0.6468	0.2972	709.7	55.31	113.9	13.97	55.13	9.142	2.532	6.683	0.8544	4.482	0.7824
MSM82-58-DR-2	WRGR	Hoyer et al. (2022) and this study	alkaline	-30.1169	-36.3528	50	44.44	11.51	11.39	0.1382	10.74	7.305	2.952	3.807	2.778	0.8773		3.56	95.9375		53.77	21.42	243	848.7	59.4	496.5	79.22	111.1		54.52	494	20.68	386.9	44.04	2.009	2.308	1.25	0.5511	973.2	60.98	127.1	15.29	59.75	9.645	2.672	7.016	0.8998	4.717	0.821
MSM82-58-DR-3	WRGR	Hoyer et al. (2022) and this study	alkaline	-30.1169	-36.3528	50	46.75	11.94	10.61	0.1412	10.29	6.418	2.819	3.281	2.686	0.894		3.69	95.8292		45.28	20.21	232.9	785.2	59.73	466.6	76.58	107.8		49.95	423.2	20.63	372.4	42.21	2.107	2.257	1.332	0.8762	862.3	50.82	122.9	14.82	57.71	9.366	2.584	6.811	0.8748	4.588	0.8071
MSM82-58-DR-4	WRGR	Hoyer et al. (2022) and this study	alkaline	-30.1169	-36.3528	50	47.93	11.54	10.5	0.2221	9.14	6.905	2.123	4.794	3.307	0.905		2.01	97.3661		43.65	18.91	248	614.6	79.33	431	106.3	132.3		70.05	1133	23.89	445.5	47.11	2.091	3.054	0.9995	0.1856	1438	72.06	143.3	17.18	67.19	10.95	2.98	7.758	0.9847	5.138	0.9054
DSDP Leg 72 516 F 128-1-23-24	DSDP SITE 516	Hoyer et al. (2022) and this study	tholeiitic	-30.2765	-35.285	87	49.27	13.6	12.47	0.1815	5.317	10.11	2.728	0.3495	2.162	0.3218		3.28	96.5098		5.354	41.73	412	42.84	42.66	48.73	243.1	119.6		9.111	266.9	34.29	164.7	10.96	0.7682	1.427	0.0383	0.238	144.7	15.31	36.75	4.941	22.59	5.972	2.009	6.726	1.073	6.807	1.364
DSDP Leg 72 516 F 128-1-58-59	DSDP SITE 516	Hoyer et al. (2022) and this study	tholeiitic	-30.2765	-35.285	87	48.71	13.45	12.77	0.1704	5.346	9.815	2.92	0.3203	2.106	0.308		3.87	95.9157		6.172	40.84	397.1	37.32	49.68	49.91	240.1	113.5		7.787	268.5	34.2	168.8	11.12	0.7388	1.454	0.03556	0.2409	160	15.24	37.26	5.029	22.95	6.061	2.026	6.726	1.074	6.808	1.357
DSDP Leg 72 516 F 128-1-124-125	DSDP SITE 516	Hoyer et al. (2022) and this study	tholeiitic	-30.2765	-35.285	87	48.37	13.53	12.8	0.1757	5.288	10.01	2.696	0.3146	2.107	0.4871		4	95.7784		5.302	41.55	409	38.27	50.28	49.99	236.2	108.7		7.509	271.1	33.37	166.1	10.81	0.7348	1.411	0.0274	0.2001	176.7	15.22	36.76	4.903	22.44	5.908	1.98	6.683	1.056	6.713	1.337
DSDP Leg 72 516 F 128-2-26-27	DSDP SITE 516	Hoyer et al. (2022) and this study	tholeiitic	-30.2765	-35.285	87	48.02	13.4	13.29	0.2041	5.416	9.866	2.79	0.3337	2.107	0.3142		4.04	95.741		5.938	41.86	410.9	40.97	51.71	52.23	245.1	104.7		8.809	269.6	34.86	164.9	11.15	0.7935	1.438	0.0277	0.2278	157.1	15.55	37.26	5.008	22.92	6.019	2.009	6.724	1.069	6.817	1.365
DSDP Leg 72 516 F 128-2-37-38	DSDP SITE 516	Hoyer et al. (2022) and this study	tholeiitic	-30.2765	-35.285	87	48.36	13.67	12.96	0.1758	5.31	9.89	2.789	0.3383	2.064	0.3124		3.91	95.8695		5.744	40.8	396.9	41.8	49.17	51	243	105.3		8.899	266.5	34.78	167.5	11.08	0.7444	1.457	0.02603	0.2188	138.6	15.71	37.4	5.009	22.87	6.021	1.996	6.742	1.066	6.81	1.358
DSDP Leg 72 516 F 128 2W 63-84 (80060981)	DSDP SITE 516	Hoernle et al. (2015)	tholeiitic	-30.2766	-35.2851	87	50.7815	13.8886	12.0061	0.178328	5.8009	10.3325	2.76933	0.335676	2.30777	0.262247			98.663		6.48676	38.3424	350	35.516	43.8434	41.0676	198.339	120.45	20.4409	7.11349	247.331	35.6663	179.794	10.518	0.625801	1.52491	0.0561091	0.240609	131.846	14.6961	34.5654	4.81087	22.514	5.95595	1.99655	6.72373	1.09664	6.83365	1.36169
RC16-11RD 1	WRGR	Hoernle et al. (2015)	alkaline	-30.4333	-36.0166	50	47.0334	14.6683	9.93599	0.154512	8.69386	10.8261	2.37948	1.99835	2.5752	0.628348			98.8935		15.9301	28.0959	271.763	242.336	42.5333	91.7064	46.854	85.8688	19.7627	35.0604	902.718	24.4753	244.048	38.0986	1.48172	1.77971	0.0761486	0.777017	944.941	48.6303	97.1149	11.8178	46.5336	8.4011	2.54834	7.21105	0.966781	5.11055	0.916307
RC16-11RD 2	WRGR	Hoernle et al. (2015)	alkaline	-30.4333	-36.0166	50	47.137	14.5932	9.99881	0.15448	8.61998	10.8651	2.39959	1.91555	2.57467	0.628218			98.8866		16.297	27.125	269.954	237.552	40.7041	85.8754	46.0821	89.2498	19.9544	32.9987	852.81	23.8383	246.904	37.0889	1.25122	1.7654	0.0630362	0.821026	926.579	46.3473	96.2646	11.4824	45.9297	8.32581	2.54837	7.03876	0.938637	4.98755	0.899805
RC16-11RD 3	WRGR	Hoernle et al. (2015)	alkaline	-30.4333	-36.0166	50	46.9866	14.7472	9.99159	0.154799	8.34881	11.032	2.32198	2.11558	2.56966	0.619195			98.8874			28	270	268.128	41.7	68.1	45	66	20.4	36.2	904	24.1	461.5	36	1.1	2	BDL	0.5	913	44.5	97.2	11.04	44.4	7.74	2.4	6.81	0.96	4.82	0.81
RC16-12RD 1	WRGR	Hoernle et al. (2015)	alkaline	-30.4333	-36.0166	50	48.9496	15.9717	8.56771	0.147788	8.92009	8.45561	2.77631	2.38573	2.19571	0.675604			99.0459		61.3158	21.3532	210.643	285.998	33.6117	119.008	39.6411	94.1175	19.9217	32.9458	631.227	22.5675	314.854	47.2963	0.792451	1.89769	0.277372	0.429736	906.971	56.0059	112.393	12.7774	48.4876	8.08126	2.34168	6.60177	0.879493	4.63122	0.841711
RC16-12RD 3	WRGR	Hoernle et al. (2015)	alkaline	-30.4333	-36.0166	50	53.769	19.2121	5.33125	0.0827215	1.94396	4.76683	3.59839	6.13173	3.22614	1.34423			99.4063		28.7265	14.8141	209.243	62.2521	18.8814	40.5254	11.0084	114.948	25.5566	83.1046	1114.63	34.0788	484.242	67.0055	1.72363	2.93919	0.503649	0.502665	1458.27	94.6743	186.887	22.2334	83.5969	13.8737	3.86548	11.0085	1.43562	7.38489	1.30023
RC11-2RD 1	WRGR	Homrighausen et al. (2018;EPSL)	alkaline	-30.4166	-35.9666	46	43.2	17.45	11.6704	0.2	4.02	9.62	3.01	0.87	3.46	1.1		3.7	94.6004		29.1929	24.9784	303.393	125.029	33.2511	46.703	41.9199	145.308	22.7277	9.01262	802.701	32.8877	316.823	47.7208				0.154852	301.369	36.9625	77.0338	9.66968	40.3067	8.59582	2.78881	8.13152	1.16507	6.54616	1.20479
RC11-2RD P5	WRGR	Homrighausen et al. (2018;EPSL)	alkaline	-30.4166	-35.9666	46	43.77	14.97	5.43479	0.2	5.23	7.62	3.5	5.28	0.79	0.33		11.9	87.1248		20.6281	2.0179	63.0375	0.538441	10.4041	25.1172	6.66785	66.3014	18.2319	133.315	596.158	19.7174	444.941	71.3159				0.785644	1092.35	75.3554	135.03	13.1038	42.7853	6.03499	1.69287	4.77038	0.643827	3.52109	0.667165
RC11-2RD P9	WRGR	Homrighausen et al. (2018;EPSL)	alkaline	-30.4166	-35.9666	46	43.08	16.65	7.61231	0.08	4.54	5.06	2.99	5.87	3.01	0.93		8.9	89.8223		BDL	9	248	BDL	30.4	53.1	5.5	71	23.3	142.7	745.9	28.3	376.4	69.3				1.3	1289	78	166.9	17.67	67.3	10.72	2.99	9.22	1.19	5.99	1.07
Jean Charcot Seamount Chain
MSM82-60-DR-1	CJCSC	Hoyer et al. (2022) and this study	alkaline	-29.6736	-37.0061	90	46.51	13.16	11.54	0.1673	8.73	10.32	2.628	2.162	2.627	0.6835		1.02	98.5278		19.25	24.17	284	436.3	46.5	140.9	57.94	84.11		31.83	1034	21.59	274.6	45.86	1.947	1.921	0.06012	0.4546	981.1	56.05	125.9	14.35	55.59	9.658	2.884	7.143	0.9471	5.104	0.8868
MSM82-60-DR-2	CJCSC	Hoyer et al. (2022) and this study	alkaline	-29.6736	-37.0061	90	44.5	13.2	11.84	0.1814	9.367	10.1	2.761	1.411	2.587	0.7177		2.89	96.6651		96.67	27	309.6	478.3	54.44	259.5	56.38	179.7		15.75	951.6	27.2	132.4	42.16	0.7291	1.787	0.5877	0.7486	782.4	54.21	112.2	13.46	52.19	9.61	2.826	7.429	0.9806	5.389	0.9575
MSM82-60-DR-3	CJCSC	Hoyer et al. (2022)	alkaline	-29.6736	-37.0061	90	46.07	13.54	11.07	0.1798	8.005	10.61	2.446	1.822	2.649	0.7804		2.36	97.1722		58.99	27.83	315.4	530.2	55.94	179.1	62.47	126.3		28.57	1088	25.19	150.7	48.93	1.831	1.946	0.3206	1.015	1033	60.66	130.6	15.33	58.58	10.21	2.947	7.551	0.9871	5.41	0.9503
MSM82-60-DR-6	CJCSC	Hoyer et al. (2022)	alkaline	-29.6736	-37.0061	90	44.47	14.04	12.43	0.1886	7.21	10.13	2.17	2.077	2.778	1.111		2.89	96.6046		68.42	28.04	334.7	597.2	63.12	207.6	67.79	160.2		30.31	1197	30.67	153.9	51.78	2.48	2.087	1.679	0.9481	1069	66.04	136.4	16.48	63.41	11.1	3.19	8.332	1.106	6.09	1.101
MSM82-65-DR-1	CJCSC	Hoyer et al. (2022) and this study	alkaline	-28.6175	-37.4339	90	43.27	11.21	8.254	0.1894	5.849	13.72	2.014	4.605	2.688	0.8461		6.82	92.6455		22.87	25.03	233.7	505.5	40.88	107.2	81.31	80.63		93.38	1061	19.65	209.8	62.68	1.041	2.32	1.064	0.6414	1718	88.96	186	20.16	73.22	10.62	2.823	7.012	0.8727	4.585	0.7872
MSM82-65-DR-2	CJCSC	Hoyer et al. (2022) and this study	alkaline	-28.6175	-37.4339	90	41.57	10.89	12.55	0.1411	12.57	10.7	1.172	1.284	2.568	0.809		5.26	94.2541		112.4	29.36	283.1	978.2	76.06	444.4	82.24	110.9		24.82	392.6	19.7	139.8	43.79	2.028	2.015	0.7472	0.8625	860.7	53.19	113	13.03	50.63	8.945	2.557	6.707	0.8688	4.653	0.8004
MSM82-72-DR-3	NJCSC	Hoyer et al. (2022) and this study	alkaline	-27.3503	-39.0769	90	41.88	12.12	11.5	0.2273	10.73	11.76	1.656	3.258	2.557	0.858		2.93	96.5463		12.6	34.91	415.3	786.3	59.4	209	48.78	129.5		156.9	1018	33.44	217	109.1	0.4263	2.239	0.241	1.276	2411	119.7	236.6	25.94	92.99	14.18	4.041	10.13	1.311	7.234	1.292
MSM82-72-DR-4	NJCSC	Hoyer et al. (2022) and this study	alkaline	-27.3503	-39.0769	90	45.7	18.53	9.025	0.1634	5.097	7.924	2.577	2.715	2.192	0.7672		4.83	94.6906		27.48	14.23	240.1	49.02	21.32	46.62	51.32	120.5		53.2	1341	26.85	264.1	127.4	0.8281	1.799	0.5426	1.349	1223	110.9	210.9	21.34	72.8	10.83	3.087	7.666	1.018	5.665	1.031
MSM82-76-DR-1	NJCSC	Hoyer et al. (2022) and this study	alkaline	-26.2397	-39.4989	90	43.1	9.909	14.61	0.1864	13.02	10.35	1.746	0.9826	2.69	0.6177		2.29	97.2117		32.38	32.27	300.9	1123	79.74	432.6	74.14	121.8		15.11	722.7	21.61	107.3	47.88	2.882	1.668	0.9385	0.4168	398.7	39.94	90.44	10.88	43.19	8.238	2.512	6.56	0.8884	4.926	0.8687
MSM82-76-DR-2	NJCSC	Hoyer et al. (2022) and this study	alkaline	-26.2397	-39.4989	90	43.28	12.03	12.99	0.157	7.98	10.35	3.219	1.308	3.571	0.939		3.74	95.824		74.66	22.62	296.7	445	67.41	319.5	58.89	184.2		16.07	875.3	28.84	159.4	69.09	1.933	2.34	0.5454	2.929	625.8	62.65	134.9	16.36	64.88	12.01	3.57	9.597	1.248	6.609	1.105
MSM82-76-DR-3	NJCSC	Hoyer et al. (2022)	alkaline	-26.2397	-39.4989	90	43.26	12.06	13.18	0.1552	8.105	10.34	3.132	1.134	3.565	0.9409		3.7	95.8721		60.48	22.63	297.7	444.2	64.55	319.7	59.53	195.4		14.07	857.1	28.96	160.5	69.23	1.818	2.356	0.5513	3.15	617.4	63.05	134.7	16.4	65.21	12.11	3.601	9.642	1.257	6.663	1.112
MSM82-76-DR-4	NJCSC	Hoyer et al. (2022)	alkaline	-26.2397	-39.4989	90	43.7	12.16	13.42	0.1555	7.892	10.1	3.121	1.195	3.627	0.9634		3.23	96.3339		64.71	23.55	305.1	468.5	68.29	326.3	58.95	183		16.12	868	29.24	161.6	71.51	1.931	2.451	0.5737	3.17	630	63.46	138.5	16.81	66.93	12.48	3.697	9.88	1.292	6.847	1.144
MSM82-76-DR-5	NJCSC	Hoyer et al. (2022)	alkaline	-26.2397	-39.4989	90	43.46	11.97	13.45	0.1464	8.169	9.957	3.139	1.159	3.609	0.8874		3.63	95.9468		61.21	22.72	300.2	463.2	61.76	311.7	52.87	214.7		13.91	791.1	28.58	162.2	68.86	1.721	2.383	0.5109	3.291	594.6	63.21	133.3	16.25	65.42	12.22	3.58	9.824	1.278	6.756	1.126
MSM82-76-DR-6	NJCSC	Hoyer et al. (2022)	alkaline	-26.2397	-39.4989	90	43.57	11.88	13.32	0.1616	8.322	9.944	3.032	1.245	3.591	0.9319		3.6	95.9975		65.96	22.77	301.3	449.2	68.85	327.7	67.86	188.9		15.46	796	29.95	165	70.09	2.054	2.417	0.5845	2.847	598	64.64	135.6	16.58	66.77	12.42	3.633	10.03	1.298	6.875	1.151
MSM82-76-DR-7	NJCSC	Hoyer et al. (2022)	alkaline	-26.2397	-39.4989	90	43.4	11.83	13.64	0.1506	8.118	9.813	2.94	1.415	3.687	0.9903		3.58	95.9839		84.34	23.8	315	458.4	76.53	329.4	66.39	209.8		17.73	785.1	30.56	162.4	73.32	2.094	2.535	0.7064	2.624	601.8	65.57	140.9	17.36	69.72	12.98	3.754	10.35	1.347	7.14	1.193
MSM82-76-DR-8	NJCSC	Hoyer et al. (2022)	alkaline	-26.2397	-39.4989	90	43.44	11.83	13.51	0.1662	8.443	9.753	3.023	1.258	3.72	0.9381		3.49	96.0813		63.38	23.88	307.2	464.8	73.39	360.1	62.74	202.1		14.73	734.8	29.43	164.2	72.05	2.265	2.503	0.7674	2.872	597.9	66.08	139.9	17.07	68.41	12.81	3.685	10.28	1.338	7.097	1.177
MSM82-80-DR-1	NJCSC	Hoyer et al. (2022) and this study	alkaline	-26.3478	-40.0189	90	43.35	14.42	9.679	0.232	4.333	12.17	2.294	2.168	4.147	0.9213		5.8	93.7143		7.024	17.97	294.3	83.93	44.07	58.89	109.5	104.8		32.09	1297	26.87	297	89.86	5.103	2.711	0.1416	0.843	888.1	79.66	141.7	19.56	75.66	13.02	4.018	9.891	1.285	6.793	1.146
Tristan-type
TR230	Tristan Islands Group	Sun (1980)	no Nb and/or Y conc.	-37.2	-12.2	0													0
TR3	Tristan Islands Group	Sun (1980)	no Nb and/or Y conc.	-37.2	-12.2	0													0
TR2,2	Tristan Islands Group	Sun (1980)	no Nb and/or Y conc.	-37.2	-12.2	0													0
27861	Tristan Islands Group	Cliff et al. (1991)	alkaline	-37.32	-12.73	0	48.79	16.01	8.8	0.14	5.29	9.79	3.68	2.06	2.82	0.61		0.87	97.99				241	125	53	78	56	86		48	909	23	230	53					511	48	95.9	11.4	43.9	8.3	2.8	6.7		5.1	0.9
27854	Tristan Islands Group	Cliff et al. (1991)	alkaline	-37.32	-12.73	0	47.05	16.44	10.73	0.21	4.22	9.36	3.33	2.31	3.13	0.66		1.22	97.44				310	25	65	73	103	110		53	987	25.8	255	61					680	59.7	110.4	12.8	52.5	9.4	3.1	8.1		6	1
32182	Tristan Islands Group	Cliff et al. (1991)	alkaline	-37.32	-12.73	0	48.03	15.68	9.66	0.15	6.47	9.38	3.56	2.04	2.7	0.73		0.44	98.4				251	155	57	112	52	99		45	1019	26	240	58					561	56	123
32184	Tristan Islands Group	Cliff et al. (1991)	alkaline	-37.32	-12.73	0	48.2	15.65	9.81	0.14	6.75	9.17	3.54	2.07	2.71	0.74		0.19	98.78				253	148	67	114	52	97		44	995	27	240	57					562	56	114
32175	Tristan Islands Group	Cliff et al. (1991)	alkaline	-37.32	-12.73	0	46.42	13.91	10.02	0.16	9.15	9.76	3.4	2.3	2.69	0.67		0.25	98.48				270	376	64	170	62	99		59	1016	26	263	69					664	63	139
32177	Tristan Islands Group	Cliff et al. (1991)	alkaline	-37.32	-12.73	0	48.33	16.39	9.76	0.14	4.1	9.22	3.94	2.01	3	0.51		1.53	97.4				300	28	50	32	76	94		40	904	26	271	62					612	57	129
27860	Tristan Islands Group	Cliff et al. (1991)	alkaline	-37.32	-12.73	0	50.66	16.03	8.57	0.13	6.39	7.19	4.17	2.87	2.13	0.74		0	98.88				176	179	48	115	41	94		69	932	24	316	68					690	69	133
3/24,01	Tristan Islands Group	Cliff et al. (1991)	alkaline	-37.32	-12.73	0	48.45	16.4	10.1	0.12	5.64	8.49	3.43	1.96	3.1	0.69		0.38	98.38				251	96	52	89	54	100		43	908	27.9	244	55					561	55	105.2	12.5	51.5	9.7	3.2	8.5		6	1
27858	Tristan Islands Group	Cliff et al. (1991)	alkaline	-37.32	-12.73	0	63.39	18.05	2.84	0.07	0.36	1.21	6.62	5.78	0.55	0.16		0.45	99.03				22	7	26	2	10	79		167	271	22	724	127					577	85	151
27855	Tristan Islands Group	Cliff et al. (1991)	alkaline	-37.32	-12.73	0	48.59	16.28	9.77	0.14	6.37	8.69	3.53	1.97	2.94	0.69		0	98.97				236	112	56	107	48	104		41	922	27.2	242	55					538	59.3	109.5	13	52.1	9.9	3.2	7.9		6	1
27856	Tristan Islands Group	Cliff et al. (1991)	alkaline	-37.32	-12.73	0	47.25	13.02	9.92	0.17	8.23	12.53	2.6	2.08	2.36	0.47		0.02	98.63				274	281	62	110	119	85		48	830	24.1	185	54					614	51.3	99	11.8	46.3	8.2	2.3	6.4		5.2	0.9
27853	Tristan Islands Group	Cliff et al. (1991)	alkaline	-37.32	-12.73	0	50.45	17.78	8.06	0.13	2.63	7.37	4.63	2.78	2.47	0.78		1.74	97.08				219	11	38	8	32	104		68	942	33	295	76					799	62	126
TDC88	Tristan Islands Group	Le Roex et al (1990)	alkaline	-37.05	-12.3	0	42.63	13.99	13.85	0.22	7.5	11.82	3.37	1.84	4.05	0.66		0.73	99.93			29.3912	347	133	53	54	31	102		42.2595	900.149	23.8432	233.511	59.2944				0.466355	576.74	51	110	14.07	55.3	10.31	3.06	8.92	1.19	5.62	0.995
TR6	Tristan Islands Group	Le Roex et al (1990)	alkaline	-37.05	-12.3	0	42.75	14.24	14	0.18	6.78	12.03	2.88	1.93	4.04	0.57			99.4			28	397	104	68	45	35	100		50	902	20	339	98.7		3.7	0.475		534	78.1	167	20	75.9	13.7	3.56
TDC58	Tristan Islands Group	Le Roex et al (1990)	alkaline	-37.05	-12.3	0	41.34	13.73	14.69	0.19	8.1	11.79	2.82	1.48	4.27	0.58		1.23	98.99			26	401	88	58	60	54	105		42	879	26	245	56					473	41	101		60
ALR5T	Tristan Islands Group	Le Roex et al (1990)	alkaline	-37.05	-12.3	0	44.29	15.72	11.93	0.19	6	9.75	3.99	2.72	3.52	0.92		1.07	99.03			17	264	48	42	40	49	98		74	1305	28	307	78					769	63	146		80
TDC84	Tristan Islands Group	Le Roex et al (1990)	alkaline	-37.05	-12.3	0	47.69	18.72	9.08	0.15	3.49	7.33	5.2	3.9	3.01	1.2		0.55	99.77			7.8	147	2.4	21	4.3	13.1	96		87	1700	30	376	114					1200	80	175		90
ALR1T	Tristan Islands Group	Le Roex et al (1990)	alkaline	-37.05	-12.3	0	54.8	19.13	5.37	0.21	1.43	5.48	5.49	4.89	1.59	0.37		0.62	98.76			3.1	64		4	4.6	4.4	104		129	1505	38	513	142					1295	114	232		107
TDC85	Tristan Islands Group	Le Roex et al (1990)	alkaline	-37.05	-12.3	0	44.03	16.16	11.96	0.22	5.5	10.47	3.91	2.63	3.75	1.14		0.64	99.77			14.6	269	13	37	10.9	18	106		65	1450	32	299	83					840	63	153		82
ALR47T	Tristan Islands Group	Le Roex et al (1990)	alkaline	-37.05	-12.3	0	50.23	19.38	6.94	0.2	2.43	5.98	5.44	4.73	2.28	0.94		0.57	98.55			5.4	86		10.6		2.9	91		119	1700	32	414	125					1290	88	184		88
TDC91	Tristan Islands Group	Le Roex et al (1990)	alkaline	-37.05	-12.3	0	46.19	16.73	10.37	0.21	4.77	9.42	4.36	3.19	3.42	0.79		0.78	99.45			13.9	232		28	2.6	11.1	97		78	1210	30	347	94					820	69	154		79
TDC32	Tristan Islands Group	Le Roex et al (1990)	alkaline	-37.05	-12.3	0	45.5	16.6	10.67	0.19	4.37	9.06	4.49	3	3.2	0.97		2.25	98.05			12.4	193		28	3.2	11.4	112		75	1285	34	380	100					803	73	167		88
TDC1	Tristan Islands Group	Le Roex et al (1990)	alkaline	-37.05	-12.3	0	61.38	19.78	2.3	0.18	0.3	1.31	7.28	6.81	0.51	0.06		0.74	99.91			1.3	21					79		176	54	29	838	235						154	255		66
TDC57	Tristan Islands Group	Le Roex et al (1990)	no Nb and/or Y conc.	-37.05	-12.3	0													0
TDC55	Tristan Islands Group	Le Roex et al (1990)	alkaline	-37.05	-12.3	0	43.28	15.93	12.31	0.18	6.07	11	3.4	2.12	4.11	1.05		1.03	99.45			18.7	297	41	41	24	18.2	101		46	1295	31	286	72					669	54	129		76
ALR39T	Tristan Islands Group	Le Roex et al (1990)	alkaline	-37.05	-12.3	0	42.51	13.97	13.87	0.2	7.4	11.74	3.36	1.9	4.07	0.67		0.72	99.69			26	347	132	53	55	33	104		45	989	27	244	58					572	48	115		65
TDC72	Tristan Islands Group	Le Roex et al (1990)	alkaline	-37.05	-12.3	0	44.98	14.4	13.17	0.19	6.3	11.16	3.56	1.87	3.69	0.58		0.55	99.9			25	339	64	51	31	24	105		47	961	29	284	69					581	49	117		63
TR31	Tristan Islands Group	Le Roex et al (1990)	no Nb and/or Y conc.	-37.05	-12.3	0													0
TDC13	Tristan Islands Group	Le Roex et al (1990)	alkaline	-37.05	-12.3	0	58.34	19.9	3.69	0.13	0.76	2.91	5.7	5.88	1.13	0.2		1.18	98.64			1.6	33		3.8			80		151	776	25	591	140					1215	97	178		65
TR30	Tristan Islands Group	Le Roex et al (1990)	no Nb and/or Y conc.	-37.05	-12.3	0													0
TR560	Tristan Islands Group	Le Roex et al (1990)	no Nb and/or Y conc.	-37.2	-12.2	0													0
TR347	Tristan Islands Group	Le Roex et al (1990)	no Nb and/or Y conc.	-37.2	-12.2	0													0
TR114	Tristan Islands Group	Le Roex et al (1990)	alkaline	-37.2	-12.2	0	43.18	13.13	13.4	0.16	8.9	11.73	3.08	1.66	3.67	0.54			99.45			37	356	194	67	87	36	93		43	985	22	220	50					669	42	105		62
11902	Tristan Islands Group	Ewart et al. (2004)	alkaline	-37.32	-12.73	0	47.28	16.27	9.68	0.14	4.4	9.2	3.22	2	3.02	0.42		1.25	95.63			18.3	262	35	33.8	42.3	93.4	107		42	920	25.1	293	62.9				0.454	654	54.8	110	13	49.7	9.29	2.86	7.85	1.07	5.51	1
11903	Tristan Islands Group	Ewart et al. (2004)	alkaline	-37.05	-12.3	0	55.04	19.01	5.04	0.17	1.29	5.16	5.8	4.99	1.58	0.31		0.37	98.39			2.14	75.4		4.99	2.73	6.68	112		126	1454	35.2	519	141				1.57	1407	119	236	26.2	92.3	14.1	4	10.6	1.45	7.44	1.38
11898	Tristan Islands Group	Ewart et al. (2004)	alkaline	-37.05	-12.3	0	43.11	14.89	12.3	0.17	6.71	10.74	2.85	2.22	3.95	0.67		0.1	97.61			21.5	367	82.2	47.3	42.3	35.6	120		67.2	1189	25.2	271	67.2				0.745	732	58.7	123	14.9	58.9	10.6	3.19	8.66	1.14	5.77	1.02
11900	Tristan Islands Group	Ewart et al. (2004)	alkaline	-37.05	-12.3	0	45.78	16.3	10.94	0.19	4.36	9.26	3.93	3.18	3.33	0.95		0.1	98.22			13.3	228	4.84	29.4	9.19	22.2	129		73.4	1268	30	365	90.4				0.909	857	79.1	162	19.1	72.7	12.6	3.69	10	1.34	6.74	1.22
11897	Tristan Islands Group	Ewart et al. (2004)	alkaline	-37.05	-12.3	0	52.89	18.79	5.86	0.18	1.62	5.9	5.29	4.46	1.73	0.44		0.17	97.16			3.52	84.4	0.02	7.46	2.76	7.9	112		114	1479	32.3	506	124				1.41	1254	111	217	24	84.3	13.1	3.73	9.79	1.34	6.86	1.26
T 499	Tristan Islands Group	Willbold and Stracke (2006, 2010)	alkaline	-37.2	-12.2	0	46.5	16.8	10	0.19	3.55	9.08	4.45	3.39	2.88	0.92		0.02	97.76			11	199	3	21	4				99.2	1541	34.4	405	104.2				1.47	1014	92.7	190	22.1	83.9	13.6	3.96	10.5	1.32	6.82	1.28
T 497	Tristan Islands Group	Willbold and Stracke (2006, 2010)	alkaline	-37.2	-12.2	0	43.3	14	12.3	0.16	7.61	11.42	3.12	2.24	3.6	0.73		-0.52	98.48			25	330	129	47	69				52.9	1125	27	262	65.7				0.728	683	60.3	128	15.2	61.1	10.4	3.1	8.64	1.09	5.66	1.06
T 619	Tristan Islands Group	Willbold and Stracke (2006, 2010)	alkaline	-37.2	-12.2	0	46	17.1	9.6	0.17	4.28	9	4.15	3.24	3.15	1.11		0.05	97.8			14	255	7	28	9				61.5	1567	31.8	339	109				0.842	1003	83.7	177	21.3	80.3	13	4	9.51	1.19	6.04	1.11
T 64	Tristan Islands Group	Willbold and Stracke (2006, 2010)	alkaline	-37.2	-12.2	0	42.1	13.2	12.9	0.16	8.91	11.89	2.45	1.62	3.87	0.89		-0.3	97.99			29	250	107	40	73				40.9	1166	26.3	221	52.3				0.429	649	47.7	105	13.5	56.7	10.5	3.2	8.63	1.08	5.54	1.01
T 364	Tristan Islands Group	Willbold and Stracke (2006, 2010)	alkaline	-37.2	-12.2	0	45.3	16.3	10.8	0.17	4.93	9.97	3.74	2.97	3.58	0.73		-0.33	98.49			17	280	2	31	6				69.5	1194	29.6	307	79				0.901	868	66.9	138	16.7	65.8	11.5	3.43	9.06	1.16	5.95	1.11
T 359	Tristan Islands Group	Willbold and Stracke (2006, 2010)	alkaline	-37.2	-12.2	0	45.3	16.5	10.9	0.17	4.94	10.02	3.53	2.76	3.6	0.74		0.44	98.46			18	296	2	30	6				72.9	1207	29.9	311	78.3				1.052	875	67.5	139	16.9	66.8	11.5	3.42	9.17	1.16	5.96	1.11
T 347	Tristan Islands Group	Willbold and Stracke (2006, 2010)	alkaline	-37.2	-12.2	0	45.9	16.3	10.4	0.17	4.55	9.4	3.66	2.99	3.36	0.84		0.1	97.57			15	270	23	29	10				76.3	1216	30.6	331	82.3				0.927	865	72.4	149	18	70.1	11.9	3.61	9.4	1.2	6.16	1.15
T 529	Tristan Islands Group	Willbold and Stracke (2006, 2010)	alkaline	-37.2	-12.2	0	44	16.3	11.6	0.18	4.88	10.12	3.37	2.58	3.69	1		0.36	97.72			17	253	20	30	16				73.7	1397	32.7	284	75.1				0.847	941	65.5	144	17.8	72.2	12.4	3.66	9.95	1.24	6.31	1.17
T 526	Tristan Islands Group	Willbold and Stracke (2006, 2010)	alkaline	-37.2	-12.2	0	41.6	15.9	12.6	0.18	5.45	10.66	2.69	2.03	3.94	0.91		1.18	95.96			19	352	21	39	15				40.1	1397	30.2	267	78.2				0.529	966	62.6	137	17.8	70.9	12.3	3.85	9.2	1.16	5.87	1.07
T 39	Tristan Islands Group	Willbold and Stracke (2006, 2010)	alkaline	-37.2	-12.2	0	41.5	13.6	14.3	0.16	7.45	11.62	2.47	1.04	4.12	0.65		0.52	96.91			26	281	36	36	23				28.7	1070	25.8	226	47.4				0.541	552	43.3	97.1	12.4	52.3	9.78	2.99	8.19	1.04	5.34	0.98
T 114	Tristan Islands Group	Willbold and Stracke (2006, 2010)	alkaline	-37.2	-12.2	0	42.5	12.4	13.7	0.16	9.49	11.85	2.33	1.53	3.69	0.46		-0.48	98.11			39	400	172	57	74				36.6	863	22.6	204	42.9				0.457	625	39.7	89.6	11.2	46.4	8.49	2.55	7.12	0.903	4.7	0.868
T 20	Tristan Islands Group	Willbold and Stracke (2006, 2010)	alkaline	-37.2	-12.2	0	46	16.4	10.8	0.18	4.43	9.4	3.75	3.05	3.26	0.91			98.18			15	228	5	28	6				68	1285	31.4	350	90.2				0.891	890	76.6	159	19.1	74.4	12.5	3.76	9.72	1.22	6.21	1.14
T 170	Tristan Islands Group	Willbold and Stracke (2006, 2010)	alkaline	-37.2	-12.2	0	43.3	15.7	12	0.18	5.51	10.67	3.31	2.56	3.79	1		-0.3	98.02			19	280	26	32	15				55.1	1395	32	269	71.2				0.686	898	64.7	140	17.7	71.8	12.6	3.76	10.2	1.27	6.57	1.21
T 112	Tristan Islands Group	Willbold and Stracke (2006, 2010)	alkaline	-37.2	-12.2	0	43.3	14.6	12.8	0.16	6.61	11.61	2.87	1.9	3.8	0.58		-0.36	98.23											46.2	983	26.9	269	61.9				0.527	593	51.4	111	13.6	54.8	9.9	3.06	8.06	1.03	5.28	0.976
T 562	Tristan Islands Group	Willbold and Stracke (2006, 2010)	alkaline	-37.2	-12.2	0	42	15	13	0.17	6.3	11.56	3.02	2.53	4.12	0.61		-0.36	98.31											60.9	1152	27.6	241	61.7				0.79	807	49.9	109	13.7	56.9	10.4	3.11	8.55	1.06	5.4	1
T 505	Tristan Islands Group	Willbold and Stracke (2006, 2010)	alkaline	-37.2	-12.2	0	43.7	15.8	11.7	0.18	5.43	10.37	3.35	2.58	3.72	1.22		-0.08	98.05			19	268	9	32	9				62.9	1427	32.2	302	72.5				0.887	847	66.3	146	18.3	74.5	13.1	3.9	10.5	1.3	6.6	1.21
T 349	Tristan Islands Group	Willbold and Stracke (2006, 2010)	alkaline	-37.2	-12.2	0	40.6	14.2	13.5	0.16	7.75	11.14	2.18	1.55	4.09	0.83		1.84	96			30	339	97	51	83				54.6	1659	27.8	267	58.9				0.661	800	55.3	120	14.8	60.9	11	3.29	9.28	1.17	5.99	1.1
T 16	Tristan Islands Group	Willbold and Stracke (2006, 2010)	alkaline	-37.2	-12.2	0	43.9	16.4	10.9	0.18	4.74	10.26	3.27	2.92	3.69	1.14		0.25	97.4			14	247		27	2				53	1406	30.4	286	74.7				0.673	860	60.4	130	16.7	68.2	11.9	3.62	9.24	1.14	5.84	1.07
T 60	Tristan Islands Group	Willbold and Stracke (2006, 2010)	intermediate	-37.2	-12.2	0	40.6	10.5	15.4	0.16	12.2	13.7	1.45	0.83	3.7	0.26		-0.52	98.8			52	307	138	50	79				22.9	526	19.3	161	26				0.259	270	26.4	59.6	7.75	33.8	6.84	2.13	6	0.776	4.05	0.743
T 167	Tristan Islands Group	Willbold and Stracke (2006, 2010)	alkaline	-37.2	-12.2	0	42.4	14.1	12.8	0.16	7.78	11.51	2.64	2.08	3.83	0.74		-0.3	98.04			29	338	98	43	48				58.4	1061	26	249	56.2				0.704	666	50.8	107	13.4	55	9.94	2.98	8.22	1.04	5.31	0.975
T 129	Tristan Islands Group	Willbold and Stracke (2006, 2010)	alkaline	-37.2	-12.2	0	42.4	13.7	14.3	0.16	7.94	10.86	2.56	1.96	3.81	0.46		-0.23	98.15			31	361	127	52	67				54.4	855	24.5	260	51.7				0.584	562	48.5	103	12.4	49.8	9.08	2.76	7.51	0.962	5.02	0.936
T 557	Tristan Islands Group	Willbold and Stracke (2006, 2010)	alkaline	-37.2	-12.2	0	42.1	13.5	13.4	0.17	8	11.96	2.56	1.63	3.93	0.57		-0.37	97.82			32	352	95	42	53				38.3	954	25.1	228	51.5				0.42	579	47.1	103	12.8	53.2	9.84	2.97	8.28	1.06	5.44	1.01
T 555	Tristan Islands Group	Willbold and Stracke (2006, 2010)	alkaline	-37.2	-12.2	0	41.3	14.1	13.6	0.17	7.67	11.94	2.22	1.7	4.05	0.61		0.77	97.36			29	290	69	39	39				35.1	970	27.1	247	58.5				0.426	585	50.4	110	13.6	55.6	10.3	3.12	8.6	1.08	5.53	1.02
T 482	Tristan Islands Group	Willbold and Stracke (2006, 2010)	alkaline	-37.2	-12.2	0	43.1	14.4	12.7	0.17	6.94	11.07	3	2.13	3.89	0.68		-0.51	98.08			28	304	78	40	46				47.8	1051	27.8	272	63.9				0.545	641	55.3	117	14.3	58.2	10.4	3.12	8.64	1.1	5.66	1.05
T 564	Tristan Islands Group	Willbold and Stracke (2006, 2010)	alkaline	-37.2	-12.2	0	44.4	15.5	12.2	0.17	5.6	10.22	3.51	2.39	3.65	0.7		-0.31	98.34			23	333	23	41	25				52.9	1126	27.1	298	85.6				0.633	731	60.6	132	16.1	62.3	10.8	3.43	8.04	1.02	5.21	0.951
T 120	Tristan Islands Group	Willbold and Stracke (2006, 2010)	alkaline	-37.2	-12.2	0	44	15.4	12.3	0.17	5.75	10.22	3.11	2.41	3.68	0.68		-0.32	97.72			22	294	18	39	24				63.7	1122	27.6	291	70.4				0.707	724	59.5	124	15.1	60.5	10.5	3.18	8.52	1.08	5.61	1.05
T 568	Tristan Islands Group	Willbold and Stracke (2006, 2010)	alkaline	-37.2	-12.2	0	44.1	15.5	12.2	0.17	5.62	10.18	3.41	2.26	3.66	0.71		-0.33	97.81			24	349	16	42	25				53.5	1159	27.5	294	78.9				0.656	738	61.6	130	16.2	62.9	11	3.44	8.48	1.08	5.5	1.02
T 186	Tristan Islands Group	Willbold and Stracke (2006, 2010)	alkaline	-37.2	-12.2	0	41.6	13.4	14.4	0.17	6.88	12.58	2.67	1.65	4.1	0.43		-0.34	97.88			35	430	52	50	42				46.5	800	25.3	243	50.7				0.586	535	45	98	12	49.9	9.32	2.8	7.97	1.03	5.33	0.99
T 342	Tristan Islands Group	Willbold and Stracke (2006, 2010)	alkaline	-37.2	-12.2	0	45	16.3	10.8	0.16	5	9.92	3.47	2.59	3.73	1.11		-0.12	98.08			18	229	2	26	7				60.9	1455	31.4	327	77.3				0.713	845	67.9	142	17.9	72.8	12.6	3.75	10.1	1.26	6.36	1.17
T 122	Tristan Islands Group	Willbold and Stracke (2006, 2010)	alkaline	-37.2	-12.2	0	42.9	13.4	14.4	0.17	7.28	11.49	2.23	1.74	3.8	0.46		-0.47	97.87			34	405	122	52	44				37.5	859	24.4	238	51.7				0.39	559	46.4	100	12.1	49.5	8.94	2.69	7.48	0.962	4.97	0.926
90648	Tristan Islands Group	Gibson et al. (2005)	alkaline	-37.05	-12.3	0	41.93	13.87	13.52	0.16	6.89	12.36	2.52	1.86	4.1	0.54		0.06	97.75			30.1	388	83.3	57.7	43.6	37.5	82	33.1	53.4	904	26.39	226	49.8				0.51	623	45.61	99.75	12.36	49.7	9.25	2.82	7.73	1.03	5.34	0.91
T3	Tristan Islands Group	Gibson et al. (2005)	alkaline	-37.05	-12.3	0	42.53	14.27	14.05	0.16	6.82	11.72	2.83	1.56	4.11	0.58			98.63			23.9	365	57.7	57.1	39.6	44.4	127	31.7	40.3	925	27.01	243	56.6				0.5	542	48.45	105.7	13.07	52.62	9.73	3	8.35	1.1	5.68	0.94
I48	Tristan Islands Group	Gibson et al. (2005)	alkaline	-37.32	-12.73	0	48.66	16.82	9.25	0.14	5.9	9.29	3.62	2.02	2.76	0.52		0.31	98.98			13.8	205	127	33.4	86.6	34.8	88	26.1	51.4	862	25.53	225	54.3				0.52	614	50	97.48	11.18	42.78	8.039	2.573	7.059	0.978	5.05	0.89
AK-1695-6	Guyot Province	Hoernle et al. (2015)	alkaline	-36.45	-7.81	27	61.9546	17.6345	5.50879	0.0813587	0.244076	0.508492	6.1019	6.61039	0.549171	0.193227		0.99	99.3866		8.36848	5.65073	86.4119	4.96183	23.2462	28.3871	11.67	116.025	33.035	120.434	22.3457	45.7758	567.662	98.6175	2.43622	4.15746	3.96288	0.360762	225.674	89.9861	155.578	19.0347	68.5271	12.5616	2.41007	10.9762	1.68382	9.61606	1.84831
AII-93-3-1B	Guyot Province	Rohde et l. (2013)	intermediate	-37.095	-7.77849	27.41	48.6445	15.961	10.9357	0.162453	5.05635	10.4985	3.04599	1.14732	2.83277	0.497512		1.69	98.7822		32.0074	33.68	290.834	56.7819	45.4625	41.1646	46.7052	117.903	21.2629	22.9419	441.295	27.356	170.498	25.7527	1.25532	1.34373	0.434291	1.97662	350.687	26.2134	54.9115	6.83071	28.6317	6.49326	2.38055	6.56365	0.989839	5.70589	1.08954
AII-93-3-25	Guyot Province	Rohde et l. (2013)	intermediate	-37.095	-7.77849	31	49.246	16.1016	9.95326	0.121445	5.2019	10.5759	3.22842	1.23469	2.75276	0.47566		1.74	98.8916		36.7231	33.2314	290.509	56.564	40.3575	41.6178	44.7847	129.228	21.4325	35.6606	433.851	26.5193	166.84	24.8106	0.861079	1.33603	0.340415	3.34474	347.492	25.6055	53.7093	6.68079	27.8509	6.347	2.32776	6.36951	0.961912	5.53276	1.04991
AII-93-5-3	Guyot Province	Rohde et l. (2013)	tholeiitic	-34.2884	-5.02501	38.7	46.8186	17.4364	11.3675	0.123153	3.50985	9.96511	3.28407	1.55993	3.05829	1.61125		2.29	98.7341		25.924	25.5424	278.584	20.0193	24.0963	19.3236	47.7664	124.174	22.8363	19.5482	570.893	58.8196	237.349	42.507	1.14412	1.95036	1.44304	0.440755	432.723	65.2795	81.7382	12.9398	51.9005	10.1428	3.20022	10.5199	1.53783	9.03714	1.82712
AII-93-6-1	Guyot Province	Rohde et l. (2013)	tholeiitic	-34.3509	-4.97936	33.4	45.2852	18.3014	10.0283	0.126289	2.15744	10.061	4.07283	2.19954	3.08356	3.56767		4.16	98.8833		37.4626	22.6864	222.12	29.9428	17.5085	20.903	23.3265	123.918	17.8966	28.6541	587.194	55.9465	239.822	41.7473	0.74316	2.00235	2.5838	0.468875	395.926	52.3405	84.6004	10.8456	43.6288	8.94821	2.89504	8.96914	1.31254	7.70009	1.56468
PS69/435-1-DR 27-1	Guyot Province	Rohde et l. (2013)	tholeiitic	-32.9	-5.15	36.65	47.2772	18.1625	10.9316	0.172396	6.24683	9.928	3.15384	0.608458	1.96735	0.334652		1.82	98.7827		28.2402	35.5844	236.378	236.733	42.7106	135.566	62.825	102.133	19.8367	9.28987	334.304	34.4896	167.657	17.9303	0.755651	1.30433	0.425178	0.249081	146.232	15.5476	35.2348	4.81463	21.145	5.35354	1.84669	5.96533	0.990456	6.2932	1.29267
DSDP Leg 74 528 42 1W 29-45 (80060969)	DSDP Sites	Rohde et l. (2013)	intermediate	-28.53	2.32406	70	50.4627	15.2022	11.527	0.207965	5.79183	5.88541	4.1697	2.33961	2.58917	0.540709		3.5	98.7164		13.0461	22.6603	343.564	4.37916	33.1287	10.4998	35.4135	115.311	22.4385	38.3881	307.962	41.4864	262.871	48.1507	2.01333	1.95448	0.0893838	0.0724697	653.811	45.5454	89.2003	10.4611	41.2869	8.23828	2.55716	8.2808	1.28138	7.79905	1.5516
DSDP Leg 74 527 42 4W 59-68 (80060963)	DSDP Sites	Rohde et l. (2013)	tholeiitic	-28.0415	1.76349	70	49.4477	14.6415	12.64	0.229262	7.05502	6.40892	3.95998	1.25052	2.57399	0.385577		3.7	98.5924			33	408	14.2555	41.2	13.3	60.3	88	20.8	16.5	289	39.1	184.5	29.3	1.4	1	BDL	BDL	353	28.3	62.2	7.05	29.5	6.1	2.1	6.74	1.16	6.65	1.43
DSDP Leg 74 528 47 3W 66-80 (80060978)	DSDP Sites	Rohde et l. (2013)	tholeiitic	-28.53	2.32406	70	49.7824	15.1264	11.2428	0.227932	5.7501	8.49565	3.94737	1.25363	2.49689	0.424782		3.2	98.748		10.0561	33.0202	363.899	35.6303	38.6326	29.7341	81.5578	109.641	20.9742	20.8597	321.034	39.5289	190.008	28.4962	2.21378	1.50982	0.057762	0.0788167	402.339	30.1714	61.1108	7.37939	30.644	6.73539	2.2616	7.30243	1.18007	7.43847	1.51251
DSDP Leg 74 528 44 3W 96-130 (80060974)	DSDP Sites	Rohde et l. (2013)	tholeiitic	-28.53	2.32406	70	50.165	15.0856	10.4101	0.206228	6.27965	10.1052	3.28934	1.09301	1.93854	0.268097		2.7	98.8407			38	374	35.2629	41.8	22.7	116.3	79	19.5	12.5	288.8	31.2	141.1	22	1.6	1	BDL	BDL	303	19.6	44.7	5.19	22.2	4.89	1.74	5.56	0.94	5.72	1.17
DSDP Leg 74 527 43 4W 59-73 (80060964)	DSDP Sites	Rohde et l. (2013)	tholeiitic	-28.0415	1.76349	70	49.4928	14.6584	12.7239	0.196687	6.63561	6.91511	3.75776	1.25259	2.51553	0.434783		3.1	98.5831		12.2875	30.9069	346.077	14.3028	39.2047	17.9224	72.7057	107.619	21.0395	21.5312	278.432	41.4429	195.567	28.9851	1.41084	1.4422	0.0358577	0.0505163	380.245	30.2774	61.3077	7.45948	30.9489	6.91823	2.28785	7.58419	1.217	7.63854	1.5564
DSDP Leg 74 527 44 4W 59-72 (80060965)	DSDP Sites	Rohde et l. (2013)	tholeiitic	-28.0415	1.76349	68.3	49.1008	14.0993	12.5386	0.195252	5.90895	9.25907	3.53509	1.05847	2.53828	0.369952		2.4	98.6037		9.13462	33.8886	362.09	18.4706	41.0783	21.0151	90.2956	105.252	20.8699	16.9756	302.779	39.5813	182.428	26.9503	1.40955	1.12032	0.0341201	0.0382999	351.582	27.6471	56.0118	6.79916	28.3049	6.37857	2.15447	7.09394	1.14655	7.18586	1.46488
DSDP Leg 74 528 45 2W 109-119 (80060975)	DSDP Sites	Rohde et l. (2013)	tholeiitic	-28.53	2.32406	70	48.9494	15.1951	10.0681	0.217369	7.70107	11.0237	2.85685	0.859124	1.7907	0.217369		3.1	98.8788		16.2908	37.6983	328.569	66.5398	41.3674	55.9286	119.626	81.2097	17.791	11.9079	271.115	28.5279	126.201	18.1581	3.18874	1.08306	0.0422432	0.0309617	268.012	18.3306	37.283	4.56897	19.2182	4.54355	1.58402	5.07467	0.827185	5.23564	1.06551
DSDP Leg 74 528 43 2W 80-98 (80060972)	DSDP Sites	Rohde et l. (2013)	tholeiitic	-28.53	2.32406	69.3	49.4084	15.6806	10.3506	0.154337	6.6262	11.5958	2.75749	0.565902	1.50221	0.205782		2.5	98.8474		7.95178	36.2207	312.911	46.1387	41.9785	43.7896	148.264	83.3781	18.1414	5.29787	274.357	26.1207	102.57	15.6585	1.62732	0.937437	0.0315162	0.0203427	207.567	14.5409	30.0307	3.75872	16.2181	3.89735	1.38161	4.40593	0.731241	4.65104	0.966527
DSDP Leg 74 528 47 2W 103-117 (80060977)	DSDP Sites	Rohde et l. (2013)	tholeiitic	-28.53	2.32406	70	49.006	14.3819	12.7358	0.217436	5.97432	7.96231	3.7896	1.28391	2.79561	0.434873		3.1	98.5818			33	433	35.4089	37.7	19.1	69.6	100	18.9	16.2	344.2	39.3	157.9	20.2	1	1	BDL	BDL	447	24.2	50.9	6.36	28.9	6.1	2.29	6.86	1.2	6.75	1.39
DSDP Leg 74 528 40 2W 73-85 (80060968)	DSDP Sites	Rohde et l. (2013)	tholeiitic	-28.53	2.32406	68.7	49.3685	15.6587	9.47012	0.164288	7.04384	12.7837	2.58753	0.472328	1.2527	0.143752		2.4	98.9454		7.24853	40.6175	283.018	75.6039	40.6195	52.3231	143.842	71.816	17.0293	9.161	234.614	23.7805	80.2917	10.331	0.600532	0.775023	0.0285647	0.0434872	154.754	10.7714	22.4789	2.86148	12.5925	3.18795	1.17766	3.83152	0.648406	4.25781	0.886175
DSDP Leg 74 528 42 5W 31-46 (80060971)	DSDP Sites	Rohde et l. (2013)	tholeiitic	-28.53	2.32406	69	48.796	18.2088	8.7131	0.143457	5.84076	13.2903	2.40803	0.399631	1.09642	0.13321		2.2	99.0297		5.96401	34.9959	274.098	119.768	35.7236	64.513	123.318	72.4273	16.8246	7.27299	208.387	23.6584	68.454	9.36049	0.571069	0.769049	0.03745	0.0415081	127.616	8.87087	18.5264	2.36991	10.6873	2.84824	1.06075	3.53202	0.618865	4.14883	0.877797
DSDP Leg 74 527 41 1W 47-63 (80060958)	DSDP Sites	Rohde et l. (2013)	tholeiitic	-28.0415	1.76349	70	49.3809	15.5643	10.5443	0.181214	6.52371	12.6246	2.41619	0.251686	1.22823	0.110742		0.4	98.8258		6.30689	40.8765	327.346	88.181	40.8707	50.3051	159.848	83.5417	17.3396	3.44869	138.157	27.1587	67.6658	6.88391	0.50859	0.849574	0.0251352	0.0577795	82.4273	7.0007	15.3699	2.09229	10.0562	2.97633	1.11766	3.87262	0.690268	4.6841	0.998835
DSDP Leg 74 527 41 5W 95-105 (80060961)	DSDP Sites	Rohde et l. (2013)	tholeiitic	-28.0415	1.76349	70	49.3557	16.2354	8.9843	0.192796	7.11314	12.5824	2.78031	0.192796	1.44089	0.121766		1.1	98.9995		11.1718	46.4757	331.482	302.866	44.7367	85.6164	176.581	77.1275	17.8519	2.85368	170.255	29.8797	88.4148	4.78708	2.74072	0.856303	0.0523103	0.0789947	44.7106	5.47903	13.5069	2.05343	10.6271	3.46818	1.32608	4.58081	0.807049	5.38226	1.12426
DSDP Leg 74 74-528-42R-1-16-24	DSDP Sites	Salter et al.. (2010)	intermediate	-28.5248	2.324	70	52.5475	15.2446	10.7865	0.24262	5.833	4.98383	4.60979	2.68904	2.43631	0.626769		3.17	100		16.3									50.3	335	46	264	58				0.09	666	49	92	13.8	51.5	10.3	3.17	10.9	1.61	9.4	1.95
DSDP Leg 74 74-528-41R-2-110-116	DSDP Sites	Salter et al.. (2010)	intermediate	-28.5248	2.324	70	51.0662	15.4017	11.43	0.232441	5.14401	6.74078	4.03234	2.62759	2.77918	0.54573		2.16	100		12.8									41.3	411	53	269	64				0.09	700	50	96	12.4	48	10	3.14	11	1.63	9.5	1.96
DSDP Leg 74 74-528-42R-1-49-59	DSDP Sites	Salter et al.. (2010)	intermediate	-28.5248	2.324	70	51.2613	14.9529	11.8732	0.202614	6.05815	6.08854	4.1941	2.25914	2.56306	0.547057		2.98	100		15.8									35.4	280	49	285	59				0.06	696	42	90	10.3	39.8	8.2	2.6	9.1	1.37	7.9	1.67
DSDP Leg 74 74-527-44R-1-0-10	DSDP Sites	Salter et al.. (2010)	intermediate	-28.0415	1.7633	70	55.5296	15.067	10.3896	0.162338	5.01218	3.73377	5.15422	2.45536	1.91761	0.578328		3.2	100		16.2									48.3	261	49	254	48				0.09	551	40	84	12.9	48	10	3.2	11.1	1.78	10.6	2.27
DSDP Leg 74 74-527-44R-3-4-14	DSDP Sites	Salter et al.. (2010)	intermediate	-28.0415	1.7633	70	52.8051	15.0857	10.6219	0.162321	5.60008	8.4407	3.90585	1.41017	1.65365	0.314497		3.2	100		13									26.1	292	46	246	38				0.04	431	32	63	7.6	29.6	6.5	2.16	7.5	1.21	7.5	1.62
DSDP Leg 74 74-527-43R-3-0-8	DSDP Sites	Salter et al.. (2010)	intermediate	-28.0415	1.7633	70	50.5394	14.6855	13.3014	0.193365	6.49298	6.60493	3.78587	1.32302	2.64604	0.427437		2.68	100		14.3									22.5	269	42	185	34				0.04	354	28	57	7.6	30.7	6.7	2.3	7.7	1.22	7.8	1.65
DSDP Leg 74 74-528-45R-1-15-18	DSDP Sites	Salter et al.. (2010)	tholeiitic	-28.5248	2.324	70	51.4995	16.5909	10.3504	0.222155	6.14965	6.49298	3.82712	2.32253	2.20135	0.34333		3.42	100		7.8									25.4	315	37	183	29				0.09	381	27	54	6.3	25	5.8	1.93	6.4	1.05	6.4	1.34
DSDP Leg 74 74-527-43R-1-57-66	DSDP Sites	Salter et al.. (2010)	tholeiitic	-28.0415	1.7633	70	50.4313	14.3713	12.8083	0.233431	6.9116	7.35817	3.8364	1.07581	2.56775	0.405968		2.59	100		14.2									13.6	291	44	192	33				0.04	359	29	61	7.6	31.1	7.1	2.41	7.9	1.24	7.6	1.61
DSDP Leg 74 74-528-47R-3-67-81	DSDP Sites	Salter et al.. (2010)	tholeiitic	-28.5248	2.324	70	50.5905	15.1913	11.6281	0.242253	5.91501	8.37791	3.92652	1.22136	2.473	0.434037		2.52	100		10.5									20.8	353	44	200	33				0.07	416	31	63	7.6	30.7	6.8	2.32	7.8	1.22	7.5	1.6
DSDP Leg 74 74-527-43R-4-74-80	DSDP Sites	Salter et al.. (2010)	tholeiitic	-28.0415	1.7633	70	50.564	14.6225	12.9662	0.203231	6.67615	6.8489	3.81059	1.2702	2.60136	0.436947		2.62	100		13.8									23.8	294	48	218	35				0.05	402	32	65	7.9	31.5	7.1	2.38	8.1	1.29	8	1.69
DSDP Leg 74 74-528-47R-3-33-40	DSDP Sites	Salter et al.. (2010)	tholeiitic	-28.5248	2.324	70	49.8833	14.7205	12.864	0.273917	5.91458	7.12184	4.29137	1.38988	3.05367	0.486964		2.97	100		8.7									23	351	46	202	32				0.06	514	30	64	7.9	31.7	7.1	2.6	7.6	1.24	7.5	1.61
DSDP Leg 74 74-528-47R-1-74-81	DSDP Sites	Salter et al.. (2010)	tholeiitic	-28.5248	2.324	70	49.3875	14.8324	12.5747	0.253113	5.51787	8.47423	4.10044	1.42756	2.92599	0.506227		2.75	100		8.7									19.5	321	45	191	31				0.04	430	26	58	7.5	31.5	7.3	2.67	8.1	1.28	7.9	1.7
DSDP Leg 74 74-528-47R-2-27-35	DSDP Sites	Salter et al.. (2010)	tholeiitic	-28.5248	2.324	70	50.0759	14.7972	12.1473	0.262972	5.49206	8.10155	4.22777	1.49692	2.86234	0.536057		1.95	100		9.4									20.2	330	52	211	35				0.04	545	32	68	8.8	35.5	8.1	2.94	9.3	1.48	9	1.93
DSDP Leg 74 74-527-42R-3-84-92	DSDP Sites	Salter et al.. (2010)	tholeiitic	-28.0415	1.7633	70	50.7912	14.6987	12.2946	0.202881	6.92838	7.02982	3.76344	1.32887	2.56644	0.395618		2.91	100		13.6									23.1	282	41	182	25				0.09	341	26	54	6.9	27.6	6.3	2.17	7.3	1.15	7.1	1.51
DSDP Leg 74 74-528-40R-5-139-146	DSDP Sites	Salter et al.. (2010)	tholeiitic	-28.5248	2.324	70	49.8437	16.5171	9.62993	0.161339	6.9275	12.5845	2.47051	0.443683	1.28063	0.141172		1.84	100		8.3									9.5	264	27	93	12				0.05	177	12	24	3	12.5	3.2	1.18	3.7	0.64	4.2	0.92
DSDP Leg 74 74-528-39R-4-136-146	DSDP Sites	Salter et al.. (2010)	tholeiitic	-28.5248	2.324	70	49.8941	17.3207	8.92767	0.151316	6.65792	13.0132	2.33027	0.423686	1.15001	0.131141		1.7	100		8.3									9.1	262	27	87	12				0.04	154	11	23	2.8	12.3	3.2	1.18	3.7	0.63	4.1	0.92
DSDP Leg 74 74-528-39R-2-6-14	DSDP Sites	Salter et al.. (2010)	tholeiitic	-28.5248	2.324	70	50.1964	16.6113	9.52957	0.151103	7.44434	11.504	2.63927	0.493603	1.27934	0.151103		1.75	100		13.2									11.4	278	31	98	13				0.08	180	12	27	3.4	14.2	3.7	1.36	4.3	0.76	4.9	1.08
DSDP Leg 74 74-528-46R-1-78-86	DSDP Sites	Salter et al.. (2010)	tholeiitic	-28.5248	2.324	70	49.8181	16.9665	9.20574	0.181892	6.72999	12.3888	2.68795	0.51536	1.34398	0.161681		1.69	100		11.9									10.9	241	37	132	15				0.05	164	14	29	3.7	15.7	4.2	1.47	5	0.88	5.8	1.25
DSDP Leg 74 74-528-42R-4-134-143	DSDP Sites	Salter et al.. (2010)	tholeiitic	-28.5248	2.324	70	49.529	18.9811	8.24471	0.141801	5.77332	13.3192	2.42074	0.384888	1.07364	0.131672		1.55	100		7.2									7.5	224	25	71	10				0.04	128	8.7	19	2.4	10.4	2.8	1.06	3.3	0.6	4	0.88
DSDP Leg 74 74-527-39R-3-72-78	DSDP Sites	Salter et al.. (2010)	tholeiitic	-28.0415	1.7633	70	51.1848	14.0954	12.6513	0.193227	6.01037	10.4241	2.87806	0.488152	1.86108	0.213567		1.56	100		11.9									10.1	171	50	140	16				0.04	186	15	33	4.3	18.7	5.3	1.84	6.4	1.18	8	1.78
DSDP Leg 74 74-527-40R-1-117-122	DSDP Sites	Salter et al.. (2010)	tholeiitic	-28.0415	1.7633	70	50.7983	14.2073	12.5597	0.183057	6.35615	10.4749	2.91874	0.457643	1.84074	0.203397		1.23	100		12.4									9.1	161	47	129	15				0.03	169	13	30	3.9	17.6	5	1.76	6	1.1	7.5	1.65
DSDP Leg 74 74-527-41R-4-16-23	DSDP Sites	Salter et al.. (2010)	tholeiitic	-28.0415	1.7633	70	50.2276	16.3346	10.175	0.182057	6.3012	12.7036	2.45777	0.2124	1.28452	0.121371		1.12	100		8.5									2.1	154	33	81	8.9				0.02	94	7.8	18	2.4	10.9	3.2	1.21	3.9	0.74	5.1	1.12
DSDP Leg 74 74-527-41R-5-89-94	DSDP Sites	Salter et al.. (2010)	tholeiitic	-28.0415	1.7633	70	50.4145	16.9834	8.54226	0.222402	6.99555	12.0299	2.94177	0.232511	1.51638	0.12131		2.24	100		15.1									1.6	188	35	100	5.8				0.03	54	6.3	16	2.3	11.8	3.9	1.47	4.5	0.87	5.8	1.27
DSDP Leg 74 74-527-41R-5-105-109	DSDP Sites	Salter et al.. (2010)	tholeiitic	-28.0415	1.7633	70	50.1515	16.4108	9.21026	0.201979	6.8774	12.5833	2.74692	0.262573	1.43405	0.121188		1.59	100		11.7									5.4	188	37	100	5.9				0.16	51	6.2	15	2.3	11.6	3.9	1.43	4.5	0.87	6	1.29
Gough-type
ALR46G	Gough Island	Class et al. (2008)	v	-40.32	-9.92	0													0
ALR38G	Gough Island	Class et al. (2008)	alkaline	-40.32	-9.92	0													0													20.8595		36.643				0.139		43.4	83.2	10.29	39.6	7.47	2.35	6.76	0.92	4.72	0.848
ALR43G	Gough Island	Class et al. (2008)	alkaline	-40.32	-9.92	0													0													21.969		37.2745				0.101		39.2	79.3	9.83	39	7.91	2.52	7.25	1	5.15	0.926
ALR47G	Gough Island	Class et al. (2008)	alkaline	-40.32	-9.92	0													0			18.6635								38.4886	592.66	23.381	272.471	39.3586				0.2219	627.121	42.6	87.2	10.13	40.5	8.27	2.65	7.45	1.03	5.27	0.965
ALR5G	Gough Island	Class et al. (2008)	alkaline	-40.32	-9.92	0													0													17.8		30.7				0.14		30.3	62.8	7.79	30.7	6.25	1.9	5.59	0.79	4.01	0.72
ALR46G	Gough Island	Class et al. (2008)	alkaline	-40.32	-9.92	0													0													21.8135		34.1365				0.3285		38.7	75.2	9.61	38.1	7.81	2.44	7.14	0.99	5.01	0.916
ALR56G	Gough Island	Class et al. (2008)	alkaline	-40.32	-9.92	0													0			23.3995								33.6368	570.276	20.5546	223.299	35.3648				0.40695	536.331	37.7	75.6	8.64	33.6	6.84	2.14	6.28	0.88	4.58	0.854
ALR55G	Gough Island	Class et al. (2008)	alkaline	-40.32	-9.92	0													0			23.4916								36.9796	558.033	20.1317	231.985	35.4704				0.20285	550.048	36.1	75.8	8.58	33.6	6.87	2.12	6.28	0.88	4.61	0.847
ALR41G	Gough Island	Class et al. (2008)	intermediate	-40.32	-9.92	0													0													19.4077		23.5337				0.072015		24.9	51.4	6.89	28.1	6.28	2.05	6	0.91	4.52	0.845
ALR14G	Gough Island	Class et al. (2008)	alkaline	-40.32	-9.92	0													0			20.0214								36.6786	770.394	25.3652	281.745	44.2467				0.11315	725.5	46.9	98.4	11.79	46.2	9.14	2.83	7.88	1.1	5.63	1.031
ALR35G	Gough Island	Class et al. (2008)	alkaline	-40.32	-9.92	0													0													25.8695		46.7915				0.232		54.8	108.9	13.6	53	10.14	3.1	8.98	1.22	6.08	1.071
ALR32G	Gough Island	Class et al. (2008)	alkaline	-40.32	-9.92	0													0			15.5441								49.2184	830.461	25.2654	341.685	49.2476				0.1313	851.659	51.5	107.3	13.11	50.8	9.97	3.05	9.22	1.26	5.87	1.022
ALR37G	Gough Island	Class et al. (2008)	alkaline	-40.32	-9.92	0													0													16.2995		36.0275				0.371		32.6	61.8	7.36	28.2	5.42	1.63	5.01	0.7	3.63	0.68
ALR63G	Gough Island	Class et al. (2008)	alkaline	-40.32	-9.92	0													0			9.10405								78.9317	976.283	24.3019	358.687	72.9243				0.3647	1204.55	74.4	142.6	15.87	59	10.63	3.64	8.55	1.15	5.67	0.988
ALR33G	Gough Island	Class et al. (2008)	alkaline	-40.32	-9.92	0													0			16.3278								48.5968	796.765	25.0813	321.617	48.7257				0.139758	767.484	49.8	103.4	12.66	49.4	9.82	3.02	9.06	1.23	5.74	1.003
ALR33G	Gough Island	Class et al. (2008)	no Nb and/or Y conc.	-40.32	-9.92	0	56.182	18.536		0.0906162	2.14458	5.10471	4.60129	4.32944	1.8828	0.231575			93.1031		16		80	5	5	6			15	320	1100	18	250						1200	115				15	4.9	12.3
ALR64G	Gough Island	Class et al. (2008)	alkaline	-40.32	-9.92	0	51.6387	16.9836	8.82483	0.121384	4.34959	9.07344	3.29759	2.39733	2.57941	0.343921			99.6098		5	22	200	100	60	90			22	55	1000	25	319	46		3.09	0.217		700	40.7	80.8	10.8	44.2	9.85	3.05	5.1	1.01	7
ALR14G	Gough Island	Class et al. (2008)	no Nb and/or Y conc.	-40.32	-9.92	0	52.403	18.9018		0.0503778	3.1335	6.64987	4.3728	3.40554	2.12594	0.443325			91.4861		5		100	8	15	8			20	100	1250	20	220						1100	40
ALR44G	Gough Island	Class et al. (2008)	no Nb and/or Y conc.	-40.32	-9.92	0	51.9444	16.1438		0.12184	4.96497	9.53396	2.95461	2.2845	2.95461	0.365519			91.2681		6	15	90	80	14	22			15	100	1000	12	125						550
ALR5G	Gough Island	Class et al. (2008)	no Nb and/or Y conc.	-40.32	-9.92	0	47.9073	15.5877		0.14052	8.40108	8.74235	2.90073	1.70631	3.31226	0.291077			88.9893		16	15	140	220	22	100			15	100	726	12	125						695	41.2	84.5		40.2	8.08	2.66	7.2		5.44
ALR34G	Gough Island	Class et al. (2008)	no Nb and/or Y conc.	-40.32	-9.92	0	61.5524	18.3932		0.151012	0.573845	1.7316	5.81899	6.04047	0.523508	0.171147			94.9562		24		10	2	10	8			20	300	120	20	450						200	40
ALR51G	Gough Island	Le Roex (1985); Class et al. (2008)	alkaline	-40.32	-9.92	0	47.69	11.99	10.75	0.16	12.12	9.12	2.91	1.8	2.74	0.44		0.48	99.72			24	177	414	64	351	46	101	17.8	40	631	22.3502	240	39.8823				0.152982	574.702	40.4	77.9	9.5	36.6	7.09	2.18	6.43	0.93	4.77	0.876
ALR52G	Gough Island	Le Roex (1985); Class et al. (2008)	alkaline	-40.32	-9.92	0	49.72	14.99	10.24	0.15	6.15	7.74	3.65	3.12	3.1	0.64		0.75	99.5			20.4433	174	142	39	111	34	105	23	65.3708	774.383	29.5111	350.442	64.2034				0.317454	841.935	64.3	117.4	14.88	55.8	10.39	3.07	9.87	1.36	6.6	1.225
ALR45G	Gough Island	Le Roex (1985); Class et al. (2008)	alkaline	-40.32	-9.92	0	48.54	14.37	10.74	0.15	7.5	7.94	3.05	2.23	3.22	0.6		1.12	98.34			20	183	183	52	240	37	118	23	32	778	24.7265	294	43.12				0.0685	673	46.3	91.6	11.45	44.6	8.79	2.85	8.14	1.11	5.71	1.034
ALR40G	Gough Island	Le Roex (1985); Class et al. (2008)	alkaline	-40.32	-9.92	0	48.54	11.14	10.93	0.16	12.25	9.42	2.78	1.62	2.59	0.46		0.68	99.89			26	194	581	62	351	31	110	17.6	30	570	20.8625	219	30.442				0.115	527	33.8	66.9	8.55	34.3	7.15	2.28	6.68	0.93	4.77	0.862
ALR44G	Gough Island	Le Roex (1985); Class et al. (2008)	alkaline	-40.32	-9.92	0	48.78	12.26	11.14	0.16	11	8.39	2.89	1.93	2.83	0.49		0.6	99.87			23	188	387	60	328	35	115	18.9	35	636	24.3624	273	37.9931				0.200841	565	38.8	75.8	9.66	38.2	7.77	2.49	7.17	1	5.09	0.959
ALR6G	Gough Island	Le Roex (1985); Class et al. (2008)	alkaline	-40.32	-9.92	0	49.68	15.09	10.57	0.15	6.07	9.59	2.93	1.92	3.25	0.55		1	99.8			23.1478	215	119	42	85	36	116	24	23.3982	727.644	28.0467	277.977	40.3282				0.1134	569.289	45.2	92.2	11.21	44.3	9.26	2.8	8.41	1.18	6.03	1.117
ALR27G	Gough Island	Le Roex (1985); Class et al. (2008)	alkaline	-40.32	-9.92	0	47.49	12.68	10.88	0.16	11.36	8.77	2.67	2.17	2.99	0.62		0.75	99.79			23.7653	193	323	62	294	33	101	17	33.2136	565.726	22.8585	268.163	48.1625				0.233946	608.956	47.2	92.6	11.28	42.8	8.08	2.46	7.54	1.04	5.02	0.928
ALR50G	Gough Island	Le Roex (1985); Class et al. (2008)	alkaline	-40.32	-9.92	0	49.92	15.27	10.15	0.15	7.04	8.62	3.45	2.19	2.98	0.59		0.83	100.36			19.5834	185	170	44	150	39	104	22	42.5941	685.542	25.9496	254.766	44.0722				0.21375	651.594	45	87.8	10.29	39.8	8.1	2.62	7.49	1.05	5.58	1.049
ALR12G	Gough Island	Le Roex (1985); Class et al. (2008)	alkaline	-40.32	-9.92	0	48.22	15.78	10.19	0.15	6.42	9.99	3.03	1.64	3.28	0.53		1.6	99.23			23.1508	203	193	40	95	36	108	21	14.8017	733.971	26.6153	273.963	42.3695				0.10385	561.987	43.8	86.6	10.51	41.3	8.67	2.71	7.99	1.13	5.79	1.065
ALR64G	Gough Island	Le Roex (1985); Class et al. (2008)	alkaline	-40.32	-9.92	0	50.33	15.05	9.76	0.14	6.65	8.34	3.6	2.63	3	0.64		0.64	100.14			17.0798	160	148	39	136	49	94	23	49.2416	687.345	29.2032	308.517	53.0829				0.27045	742.454	61.5	109.8	12.67	48.9	9.29	2.94	8.37	1.17	6.02	1.12
ALR10G	Gough Island	Le Roex (1985); Class et al. (2008)	alkaline	-40.32	-9.92	0	49.34	14.18	10.09	0.14	8.1	9	3.33	2.13	3	0.56		0.49	99.87			22	190	219	47	202	50	102	20	37	778	23.4092	276	45.227				0.053439	528.261	42.9	88.1	11.08	43.6	8.67	2.74	7.75	1.09	5.59	1.034
ALR48G	Gough Island	Le Roex (1985); Class et al. (2008)	alkaline	-40.32	-9.92	0													0			18.0282								28.4744	710.451	24.3658	279.665	41.175				0.1076	680.574	43.8	91.1	10.57	42.1	8.57	2.82	7.74	1.07	5.5	1.001
G111	Gough Island	Willbold and Stracke (2006, 2010)	no Nb and/or Y conc.	-40.32	-9.92	0	47.73	15.53		0.14	8.37	8.71	2.89	1.7	3.3	0.29			88.66			15	140	220	22	100			15	100	726	12	125						695	41.2	84.5		40.2	8.08	2.66	7.2		5.44
G8	Gough Island	Willbold and Stracke (2006, 2010)	alkaline	-40.32	-9.92	0	51.05	16.79	3.46423	0.12	4.3	8.97	3.26	2.37	2.55	0.34			93.2142			22	200	100	60	90			22	55	1000	25	319	46		3.09	0.217		700	40.7	80.8	10.8	44.2	9.85	3.05	5.1	1.01	7
G15	Gough Island	Willbold and Stracke (2006, 2010)	no Nb and/or Y conc.	-40.32	-9.92	0	55.8	18.41		0.09	2.13	5.07	4.57	4.3	1.87	0.23			92.47				80	5	5	6			15	320	1100	18	250						1200	115				15	4.9	12.3
G19D	Gough Island	Willbold and Stracke (2006, 2010)	no Nb and/or Y conc.	-40.32	-9.92	0	60.17	18.45		0.23	0.04	1.44	7.52	5.43	0.15	0.04			93.47							5			40	320		55	1000							223	503		149	23	0.5	17.8	3
G95	Gough Island	Willbold and Stracke (2006, 2010)	no Nb and/or Y conc.	-40.32	-9.92	0	52.01	18.76		0.05	3.11	6.6	4.34	3.38	2.11	0.44			90.8				100	8	15	8			20	100	1250	20	220						1100	40
G18	Gough Island	Willbold and Stracke (2006, 2010)	no Nb and/or Y conc.	-40.32	-9.92	0	60.9	18.76		0.21	0.23	1.66	6.3	6.03	0.37	0.1			94.56					22	45	8			30	300		100	1000						10	280
G132	Gough Island	Willbold and Stracke (2006, 2010)	no Nb and/or Y conc.	-40.32	-9.92	0	51.16	15.9		0.12	4.89	9.39	2.91	2.25	2.91	0.36			89.89			15	90	80	14	22			15	100	1000	12	125						550
G3	Gough Island	Willbold and Stracke (2006, 2010)	no Nb and/or Y conc.	-40.32	-9.92	0	61.14	18.27		0.15	0.57	1.72	5.78	6	0.52	0.17			94.32				10	2	10	8			20	300	120	20	450						200	40
G 110	Gough Island	Willbold and Stracke (2006, 2010)	alkaline	-40.32	-9.92	0	48	13.8	10.1	0.13	7.9	7.8	2.9	2.44	3.27	0.76		0.72	97.1			21	168	166	33	163				40.3	835	27.6	334	46.2				0.688	752	48.2	101	11.8	47.5	8.96	2.91	7.93	1.06	5.54	1.01
G 132	Gough Island	Willbold and Stracke (2006, 2010)	intermediate	-40.32	-9.92	0	51.2	14.2	9.06	0.12	5.04	9.09	2.79	2.41	3.1	0.58		1.06	97.59			27	208	139	32	73				41.7	776	29.2	321	40				0.644	644	42.7	89.3	10.9	45.9	9.02	2.78	8.18	1.09	5.8	1.09
B 167	Gough Island	Willbold and Stracke (2006, 2010)	alkaline	-40.32	-9.92	0	47.5	16.2	10.1	0.12	3.39	6.31	3.1	3.29	3.87	0.79		3.67	94.67			23	230	82	29	64				59.1	578	28.1	440	58.9				0.289	879	47.6	106	12.5	51.5	9.92	3.17	8.53	1.14	5.95	1.09
G 131	Gough Island	Willbold and Stracke (2006, 2010)	alkaline	-40.32	-9.92	0	46.5	13.3	11	0.14	9.19	8.48	2.66	1.98	3.56	0.72		0.5	97.53			24	191	315	45	230				39.8	962	27.3	269	41.3				0.228	889	44.1	89.3	11	45.9	9.06	2.86	8.06	1.04	5.43	1.01
G 139	Gough Island	Willbold and Stracke (2006, 2010)	alkaline	-40.32	-9.92	0	46.2	14.6	10	0.15	6.82	8.47	2.17	2.7	3.67	0.75		3.11	95.53			26	238	234	39	129				50.1	792	30	345	57.5				3.94	940	52.9	106	13	52.9	9.96	3.14	8.8	1.14	6	1.11
G 142	Gough Island	Willbold and Stracke (2006, 2010)	alkaline	-40.32	-9.92	0	46.1	12.1	11.5	0.15	12.1	7.79	2.19	2.16	3.02	0.53		0.43	97.64			23	190	317	55	324				60.1	744	22.6	247	45.8				0.498	716	38.4	76.8	9.19	37.7	7.16	2.34	6.45	0.856	4.56	0.864
G 141	Gough Island	Willbold and Stracke (2006, 2010)	alkaline	-40.32	-9.92	0	47	14.4	10.7	0.15	7.34	7.34	2.67	2.77	3.32	0.75		2.09	96.44			23	190	242	42	190				53.6	762	33.3	349	53.1				1.06	861	59.1	110	13.8	56.1	10.7	3.33	9.51	1.24	6.48	1.22
G 1	Gough Island	Willbold and Stracke (2006, 2010)	alkaline	-40.32	-9.92	0	47.4	12.8	10.5	0.14	9.81	8.24	2.62	1.79	2.92	0.49		0.77	96.71			25	176	363	43	256				35	684	23.3	244	33.9				0.128	687	31.9	67.1	8.15	33.9	6.96	2.35	6.48	0.87	4.64	0.864
G 116	Gough Island	Willbold and Stracke (2006, 2010)	alkaline	-40.32	-9.92	0	47.5	15.1	10.9	0.15	4.94	8.45	2.79	2.36	3.85	0.69		1.55	96.73			27	253	81	35	64				42.5	855	31.3	317	57.8				0.18	763	47.4	96.8	11.9	48.1	9.32	3.17	8.31	1.1	5.82	1.11
G 136	Gough Island	Willbold and Stracke (2006, 2010)	alkaline	-40.32	-9.92	0	49.7	15.1	9.56	0.12	5.51	6.8	3.37	2.65	2.93	0.77		1.43	96.51			19	158	163	32	123				57.8	852	29.2	347	50.1				0.44	832	51.5	102	12.3	49.5	9.44	2.94	8.27	1.09	5.69	1.06
G 14	Gough Island	Willbold and Stracke (2006, 2010)	alkaline	-40.32	-9.92	0	49.1	13.6	9.82	0.13	8.01	7.55	3.12	2.54	3.1	0.74		0.1	97.71			22	171	271	39	191				51.7	871	25	336	44.6				0.541	826	49.9	100	12.1	48.9	9.35	2.86	8.05	1.03	5.23	0.951
G 118	Gough Island	Willbold and Stracke (2006, 2010)	alkaline	-40.32	-9.92	0	46.7	11.4	10.9	0.15	13	8.47	2.04	1.76	2.75	0.48		1.18	97.65			29	192	619	63	416				34.6	640	24.9	232	40.8				0.314	503	35.6	71.5	9.15	37.4	7.26	2.28	6.47	0.85	4.52	0.86
G 13	Gough Island	Willbold and Stracke (2006, 2010)	alkaline	-40.32	-9.92	0	48	13.5	10.4	0.13	8.37	8.09	2.84	2.31	3.36	0.75		0.53	97.75			24	188	317	44	237				46.4	892	28	320	43.8				0.521	781	45.7	97.6	11.8	48.5	9.5	2.99	8.51	1.1	5.6	1.03
G 135	Gough Island	Willbold and Stracke (2006, 2010)	alkaline	-40.32	-9.92	0	49.6	14.8	9.2	0.1	5.85	6.56	3.28	2.57	2.84	0.8		0.88	95.6			18	179	180	34	104				54.4	762	29.2	335	49.6				0.218	794	50.4	103	12.2	49.6	9.47	2.95	8.54	1.14	5.95	1.11
G 6	Gough Island	Willbold and Stracke (2006, 2010)	alkaline	-40.32	-9.92	0	47.6	13.4	10.3	0.12	7.94	7.81	2.69	2.32	3.36	0.74		2.12	96.28			24	204	312	46	225				48.2	872	27.1	319	45.6				1.25	779	45.2	95.7	11.6	47.6	9.3	2.94	8.29	1.07	5.63	1.02
G 40	Gough Island	Willbold and Stracke (2006, 2010)	alkaline	-40.32	-9.92	0	49.3	13.5	9.86	0.13	7.86	7.98	3.03	2.07	2.96	0.54		0.51	97.23			25	194	327	43	181				41.8	720	26.9	298	43				0.275	672	39.8	82.5	10.2	41.6	8.49	2.69	7.67	1.05	5.55	1.05
G 120	Gough Island	Willbold and Stracke (2006, 2010)	alkaline	-40.32	-9.92	0	50.5	15.3	10.4	0.1	4.23	6.09	3.47	2.85	3.03	0.79		1.54	96.76			19	150	117	26	102				58.1	775	31.6	395	49				0.349	825	61.2	125	14.5	57.6	10.8	3.31	9.47	1.23	6.29	1.15
G 38	Gough Island	Willbold and Stracke (2006, 2010)	alkaline	-40.32	-9.92	0	43.7	15.2	11.9	0.12	6.56	6.75	2.48	0.84	3.28	0.31		6.74	91.14			24	136	218	38	180				16.3	680	26.2	282	37.6				0.558	479	33.4	59.7	8.82	37.1	8.01	2.64	7.47	1.03	5.51	1.03
G 35	Gough Island	Willbold and Stracke (2006, 2010)	intermediate	-40.32	-9.92	0	48.5	13.4	11.4	0.14	8	7.71	2.64	1.67	3.33	0.58		0.9	97.37			23	199	284	46	201				43	676	29.9	278	39.2				0.843	554	37.2	78.4	10	42.3	8.98	2.88	8.38	1.13	6	1.12
G 115	Gough Island	Willbold and Stracke (2006, 2010)	alkaline	-40.32	-9.92	0	45.2	10.3	12.2	0.16	15.5	7.68	1.81	1.48	2.48	0.33		1.31	97.14			28	194	764	80	512				31.2	472	22.4	190	38.1				0.163	432	27.6	59.9	7.57	31.5	6.61	2.13	6	0.82	4.41	0.831
G 102	Gough Island	Willbold and Stracke (2006, 2010)	alkaline	-40.32	-9.92	0	49.3	14.8	10.9	0.15	5.28	5.54	3.57	3.44	3.55	0.81		0.62	97.34			17	197	121	38	127				71	715	33.9	443	72.8				1.37	943	61.3	126	14.6	57.2	10.7	3.16	9.17	1.24	6.54	1.22
G 93	Gough Island	Willbold and Stracke (2006, 2010)	alkaline	-40.32	-9.92	0	47.2	13.5	10.5	0.14	8.73	7.46	2.74	2.63	3.47	0.78		1.08	97.15			23	188	251	50	245		106		47.7	911	27	366	46.7				0.336	898	49.4	108	12.8	51.6	9.73	3.1	8.23	1.06	5.48	0.991
G 117	Gough Island	Willbold and Stracke (2006, 2010)	alkaline	-40.32	-9.92	0	46.7	15.8	10.6	0.15	4.52	7.94	2.78	2.31	3.76	0.69		2.49	95.25			26	220	39	30	41		124		32.1	744	34.4	356	53.4				0.098	712	47.7	103	12.9	54.1	10.7	3.39	9.51	1.26	6.67	1.26
G 93	Gough Island	Willbold and Stracke (2006, 2010)	alkaline	-40.32	-9.92	0	48.735	14.9316	11.095	0.155537	7.61095	7.61095	2.76856	2.87225	3.44255	0.777686		2.09	100			23	190	242	42	190				53.6	762	33.3	349	53.1				1.06	861	59.1	110	13.8	56.1	10.7	3.33	9.51	1.24	6.48	1.22
AG51-6-1	Guyot Province	Hoernle et al. (2015)	alkaline			7.13	61.9376	17.9547	4.23994	0.192952	0.629633	1.40144	6.03229	6.48929	0.426526	0.223418		1.3	99.5278		17.7351	5.29364	8.79206	0.340865	3.27928	14.4971	3.9527	130.322	32.8902	145.426	79.5472	37.255	1032.4	146.165	2.14186	6.60647	0.509511	0.434841	105.875	119.939	207.789	22.8529	78.42	12.9878	1.9457	10.1052	1.47429	7.95548	1.40581
AG51-6-5	Guyot Province	Hoernle et al. (2015)	alkaline			16.2876	62.0438	17.8731	4.25088	0.263585	0.598135	1.4193	6.00162	6.397	0.446067	0.233171		1.1	99.5266		18.4961	4.98656	16.5896	0.254296	14.773	22.0911	5.68527	116.498	32.7756	151.457	73.6785	34.1745	867.386	140.901	2.20734	6.50934	0.857323	0.393047	111.276	116.29	209.029	22.5272	77.0178	12.7448	1.90828	9.73527	1.40423	7.44267	1.30252
AG51-7-1	Guyot Province	Hoernle et al. (2015)	alkaline	-40.1667	-8.55011	16.2876	44.4479	12.9825	10.9852	0.144479	11.0217	9.33953	2.68318	1.89886	4.14861	1.12487		2.5	98.7767		23.4281	20.6865	227.641	250.207	46.3767	220.059	24.086	117.152	18.6428	31.0903	871.031	29.8066	340.79	46.796	1.46333	2.409	0.177417	0.284226	765.42	50.1453	98.089	12.323	51.4427	10.1981	3.06793	8.96234	1.19928	6.26276	1.07937
AG51-7-2	Guyot Province	Hoernle et al. (2015)	alkaline	-40.1667	-8.55011	16.2876	45.8874	12.8538	10.8027	0.143047	10.2687	8.85869	2.90181	2.20701	4.02575	0.848064		1.5	98.797		13.1474	21.2769	228.433	262.89	46.5261	217.064	25.9217	119.048	20.2266	42.2117	851.113	28.9185	353.124	46.5844	1.74858	2.44874	0.134168	0.436692	750.099	49.2905	98.1048	12.1836	50.5665	10.0638	3.02899	8.8626	1.18731	6.18416	1.06847
AII-93-10-11	Guyot Province	Rohde et l. (2013)	intermediate	-34.3351	-1.57345	46.2	48.9109	13.7253	13.6749	0.161355	4.51795	8.76361	2.85397	1.47237	3.8927	0.504236		1.48	98.4772		11.6344	28.7922	368.209	28.0236	40.4859	31.038	112.725	133.105	23.9762	31.9629	493.789	30.4082	260.551	29.6347	1.25951	1.92342	0.0767596	1.29723	350.249	37.613	80.8384	9.81429	40.0589	8.60145	2.77947	8.14564	1.18898	6.61728	1.21029
AII-93-11-8	Guyot Province	Hoernle et al. (2015)	alkaline	-32.9702	-0.018337	40.8888	60.2043	16.9094	6.97054	0.121359	0.697816	2.32605	5.24879	6.06796	0.505663	0.171926		1.18	99.2238		14.3793	14.1696	4.3561	4.50069	0.414282	2.90202	4.52273	158.47	33.157	109.811	73.4245	52.4566	717.872	90.4643	1.62669	4.60403	0.289172	1.23182	1008.97	85.7624	172.332	20.7999	79.4563	15.6188	4.62294	13.7888	2.09765	11.7595	2.15667
AII-93-14-1	Guyot Province	Rohde et l. (2013)	intermediate	-31.9935	2.39341	59.02	54.481	16.8203	7.34419	0.0911392	3.18987	7.42278	4.14177	2.95696	2.18734	0.546835		1.37	99.1822		19.9035	21.3055	164.838	123.429	30.145	63.451	35.0297	143.944	24.3982	31.8228	436.862	30.7932	213.066	31.1381	1.02722	1.52759	0.368672	0.40882	1229.41	36.5017	77.1235	9.51359	39.7693	8.69161	4.0708	8.45993	1.21926	6.72294	1.23042
AII-93-14-19	Guyot Province	Rohde et l. (2013)	intermediate	-31.9935	2.39341	59.26	54.6862	16.85	7.24167	0.122249	3.43317	7.66096	3.93236	2.6793	2.08843	0.499185		1.87	99.1936		38.1956	20.5712	159.407	124.335	52.7677	156.041	33.0906	117.539	23.7098	37.727	446.216	29.8738	215.045	31.1397	2.01604	1.52596	0.0752058	1.45398	1277.74	36.1694	75.1611	9.321	38.6083	8.45179	3.98202	8.0744	1.1811	6.52419	1.19082
DR6-1	Guyot Province	Homrighausen et al. (2019)	intermediate	-33.2715	-0.323472	50.6462	50.6455	16.3535	10.5025	0.199433	2.71859	7.71492	3.67377	2.62412	3.34838	1.04965	0.0417058	3.55	98.8305		17.9138	19.6686	164.768	6.53365	17.6332	11.0088	10.8682	190.433	30.4519	52.5313	894.696	50.2811	393.136	62.4116	2.26629	2.74105	0.28329	0.918479	1422.02	72.8744	151.979	19.256	81.6385	16.3775	6.54603	14.6552	2.01677	10.5376	1.87534
PS69/419-1-DR 20-1	Guyot Province	Rohde et l. (2013)	intermediate	-31.53	2.02	60.3513	50.3266	18.2374	11.5122	0.124417	4.36496	6.6874	2.84085	1.63815	2.68533	0.300674		3.92	98.718		54.0349	23.6203	214.575	120.704	18.6634	44.071	51.5602	250.736	24.6631	15.765	374.844	31.0345	341.742	42.2961	1.21334	2.07815	2.5908	0.420599	370.786	39.5414	79.2551	11.3562	45.4399	9.57243	2.97448	8.81145	1.30538	7.19579	1.29068
PS69/420-1-DR 21-1	Guyot Province	Hoernle et al. (2015)	alkaline	-32.81	2.55	47	62.1707	18.7558	4.05772	0.102491	0.5432	1.22989	5.8932	6.4979	0.204981	0.0922415		2.08	99.5481		15.967	2.18572	1.54451	4.54295	0.373824	2.40718	5.58035	113.701	30.2072	182.808	29.6122	56.8785	1251.33	201.371	1.72502	6.8606	0.192576	1.44151	8.95885	172.282	293.126	29.7706	91.954	13.6698	0.615425	10.9819	1.70369	9.83964	1.97246
PS69/421-2-DR 23-1	Guyot Province	Rohde et l. (2013)	alkaline	-33.35	2.12	55.3049	48.5059	17.0219	11.3152	0.122387	2.12137	7.87353	3.52881	3.6512	3.46762	1.13208		2.02	98.74		8.38375	20.9839	262.53	162.926	28.509	88.1105	35.6747	128.896	25.2046	55.0681	826.722	33.0099	348.524	54.7707	2.16863	2.51286	2.86538	0.220803	826.963	58.9965	114.397	13.4603	51.9068	10.3206	3.1467	9.21765	1.29539	6.85169	1.21639
PS69/422-1-DR 24-1	Guyot Province	Rohde et l. (2013)	alkaline	-34.01	0.96	51.14	35.2254	12.1817	10.6248	0.210231	5.71128	26.3256	1.24971	1.29643	3.18851	2.80308		13.24	98.8168		45.4583	21.0077	221.003	323.91	34.5446	90.9625	72.0491	154.526	15.9688	22.0951	361.22	37.357	235.703	52.9512	1.23813	1.81653	2.1669	0.549251	709.067	67.5011	105.064	12.4074	47.1796	8.73753	2.62952	8.19443	1.11926	5.9521	1.11316
PS69/423-1-DR 25-1a	Guyot Province	Rohde et l. (2013)	intermediate	-34.92	0.55	47.6839	45.7942	15.6335	10.0385	0.104362	4.63369	12.2104	2.37946	2.21248	3.43352	2.44208		3.79	98.8821		31.3569	24.5516	226.946	360.358	29.5222	85.8471	32.6305	141.888	19.8515	29.5585	897.511	47.7839	329.935	62.4253	1.4812	2.39215	0.890102	0.642468	854.434	71.6	123.576	15.0908	58.2638	10.8414	3.31867	10.0354	1.396	7.6468	1.4604
PS69/423-1-DR 25-2	Guyot Province	Rohde et l. (2013)	intermediate	-34.92	0.55	47.6839	45.4526	15.806	11.0335	0.104537	3.89923	12.1054	2.36253	2.9793	3.46017	1.56805		4.45	98.7713		22.242	24.0168	230.301	337.157	28.4042	108.905	37.1859	153.87	19.8255	41.4086	843.717	55.7911	309.167	61.9518	1.45895	2.34451	1.87433	0.790045	860.957	74.217	119.803	15.417	60.0538	11.1732	3.37497	10.5206	1.4554	8.11716	1.58891
PS69/423-1-DR 25-4	Guyot Province	Hoernle et al. (2015)	alkaline	-34.92	0.55	45.6	61.3193	18.1432	4.06314	0.161632	0.727346	1.95979	5.38438	6.70775	0.707142	0.373775		0.69	99.5475		15.7279	3.1678	28.0191	9.09118	5.66009	41.0753	28.6228	89.0026	26.0862	158.549	220.394	24.3006	608.315	130.006	1.50401	3.70138	0.817168	0.825939	258.026	102.488	172.502	17.3155	54.1046	8.24117	1.74675	6.42451	0.90693	4.75448	0.873804
PS69/424-1-DR 26-1	Guyot Province	Hoernle et al. (2015)	alkaline	-34.42	0.49	49.3216	41.2071	15.6504	14.8125	0.104058	8.59521	10.666	1.46722	0.967742	4.24558	0.634755		4.54	98.3505		70.2234	34.8834	339.848	482.593	42.1183	247.422	84.2131	206.596	18.4521	11.9374	948.367	33.1058	377.331	75.178	1.40692	2.66683	4.2136	0.330174	506.275	54.3197	113.95	13.6305	53.7633	10.7274	3.32146	9.57193	1.33321	7.11618	1.27403
PS69/440-1-DR 32-2	Guyot Province	Rohde et l. (2013)	alkaline	-37.48	-2.43	37.41	46.5584	16.2944	11.7202	0.13198	5.08629	9.03553	3.28934	1.60406	3.94924	1.02538		1.74	98.6949		27.3959	20.7846	267.974	186.012	35.193	111.45	35.6113	130.703	23.819	19.9993	919.174	27.452	264.541	43.5228	1.24142	1.99439	0.488878	0.228986	623.174	42.9064	90.9484	10.9919	44.6833	9.31508	3.03368	8.31602	1.13723	6.00149	1.05865
PS69/440-1-DR 32-5b	Guyot Province	Rohde et l. (2013)	intermediate	-37.48	-2.43	37.06	45.357	17.3855	12.097	0.123813	3.15724	9.17251	3.44614	1.98102	4.23029	1.70243		2.79	98.6529		30.3125	22.1455	293.517	139.195	34.0718	94.7503	34.6859	161.381	23.9292	31.3827	934.825	30.2363	235.299	38.5672	1.07449	1.86563	3.55778	1.18446	655.676	39.2396	79.196	9.91338	41.1476	8.81301	2.97739	8.11415	1.115	5.99144	1.07008
SO233 DR3-1	Guyot Province	Hoernle et al. (2015)	alkaline	-32.8586	2.50458	57.4652	50.7022	16.7606	8.41228	0.102512	4.31574	9.3593	3.11635	2.25525	3.39313	0.645823	0	2.92	99.0632		35.9405	21.9657	224.008	158.38	38.2507	86.6967	28.861	156.381	24.1161	33.7239	842.032	27.8706	295.155	42.4576	1.44897	2.2663	0.422187	1.93578	660.324	44.6208	88.8246	10.9125	44.8072	9.20059	2.94041	8.20112	1.14752	5.97503	1.04249
V29-9-1	Guyot Province	Hoernle et al. (2015)	tholeiitic	-32.6333	1.1166	61.53	47.1392	14.4633	13.2821	0.174628	5.00257	10.2414	2.91731	0.945044	3.80072	0.5547		2.3	98.5209		18.5479	33.097	419.769	28.1292	37.132	27.3519	57.4184	163.573	25.5312	11.4835	419.769	39.671	281.011	31.4556	0.996997	2.21555	0.617782	0.413783	236.535	29.5863	62.7946	8.47235	37.0665	8.47235	2.73788	8.56028	1.29841	7.63181	1.46042
DSDP Leg 74 525 A 53 2W 91-102 (80060927)	DSDP 525	Hoernle et al. (2015)	tholeiitic	-29.0707	2.98553	71.6	55.6179	21.9624	4.03091	0.0207879	0.862696	8.2112	4.41742	1.38239	2.71282	0.332606		3.5	99.5511		7.18639	42.117	413.288	314.47	95.433	50.0641	167.738	192.48	28.8721	27.6213	397.273	29.057	236.783	16.7527	3.42496	1.84917	0.613229	0.163301	315.785	22.0752	47.2813	6.00826	26.1771	6.2837	2.18919	6.46749	1.01043	6.00628	1.15251
DSDP Leg 74 525 A 53 3W 87-97 (80060928)	DSDP 525	Hoernle et al. (2015)	tholeiitic	-29.0707	2.98553	71.5	48.2412	19.9553	6.04891	0.134003	1.03853	16.0134	4.06477	1.09436	2.41206	0.323841		10.2	99.3264		4.37999	49.9013	317.863	264.092	50.6852	47.2298	116.344	75.6273	24.7446	16.1723	374.806	34.084	190.341	14.4034	3.40252	1.58353	0.192655	0.0836625	272.852	22.1722	47.3583	6.14103	27.2018	6.80524	2.30293	7.3422	1.17561	7.1623	1.3789
DSDP Leg 74 525 A 56 2W 128-134 (80060932)	DSDP 525	Hoernle et al. (2015)	tholeiitic	-29.0707	2.98553	71.4	49.7634	14.1941	11.9015	0.136684	5.98255	10.3249	2.9755	0.641363	2.43928	0.315424		4.6	98.6747		9.63592	33.1302	304.867	37.6098	29.8456	19.7487	57.8571	103.778	20.8449	4.3055	410.645	27.5623	212.307	18.4685	3.85002	1.68243	0.0358251	0.0629996	309.386	22.2604	49.2908	6.38531	27.7285	6.2457	2.13634	6.35024	0.960027	5.61745	1.06726
DSDP Leg 74 525 A 56 2W 68-79 (80060931)	DSDP 525	Hoernle et al. (2015)	tholeiitic	-29.0707	2.98553	71.5	47.2786	14.8812	11.5633	0.24838	4.23326	13.4557	3.23974	1.05832	2.42981	0.323974		7.1	98.7123		7.37715	31.3798	292.72	38.3676	30.824	22.6668	58.4246	91.9897	20.2602	13.2544	388.548	33.8278	203.929	18.2093	1.93282	1.59133	0.044291	0.062422	305.567	25.9197	54.9835	6.89554	29.6141	6.60077	2.13574	6.86672	1.05801	6.36299	1.24528
DSDP Leg 74 525 A 56 5W 42-53 (80060937)	DSDP 525	Hoernle et al. (2015)	tholeiitic	-29.0707	2.98553	71.6	51.1026	14.5933	10.9503	0.124818	5.24235	9.66299	3.27647	1.01935	2.47556	0.332848		3.6	98.7806		8.28358	33.6173	311.774	37.6899	35.3691	24.1971	60.6536	96.2596	21.764	15.066	395.789	30.3438	226.479	19.9733	1.59611	1.72588	0.0450759	0.0586487	332.339	26.3283	56.0261	7.06987	30.1091	6.62518	2.18253	6.65851	1.00906	5.98656	1.14873
DSDP Leg 74 525 A 57 2W 91-103 (80060939)	DSDP 525	Hoernle et al. (2015)	tholeiitic	-29.0707	2.98553	71.9	51.221	16.2735	9.46272	0.114309	4.18788	9.66435	3.60594	1.2678	2.75382	0.394887		3.5	98.9462		8.65939	34.2751	331.786	37.2473	35.7678	25.2261	60.9075	114.006	24.2463	14.1645	446.08	33.8855	263.44	22.9123	5.59819	1.95751	0.0464513	0.0388173	384.301	29.6836	63.7573	8.05122	34.1744	7.49944	2.47504	7.57106	1.14223	6.75231	1.30213
DSDP Leg 74 525 A 57 5W 141-148 (80060941)	DSDP 525	Hoernle et al. (2015)	tholeiitic	-29.0707	2.98553	72.3	50.4305	14.6592	11.2767	0.124494	5.71636	9.37857	3.2576	1.04783	2.51063	0.342359		3.3	98.7443		8.35223	32.9212	313.433	48.5327	34.3429	25.5237	55.6845	99.0263	22.0032	13.4753	396.237	31.6926	231.907	20.2769	2.11231	1.73191	0.034796	0.0387176	341.489	26.8928	57.619	7.2542	30.7849	6.82783	2.23356	6.89785	1.05263	6.20196	1.196
DSDP Leg 74 525 A 58 1W 98-110 (80060943)	DSDP 525	Hoernle et al. (2015)	tholeiitic	-29.0707	2.98553	72.2	48.9894	15.585	8.8707	0.190883	2.13339	15.5064	3.39097	1.33618	2.63867	0.370537		10.7	99.0122		5.31957	33.3043	303.022	36.7749	52.0164	42.1989	57.788	106.282	21.2031	18.4176	426.509	33.2875	235.242	20.3301	2.02678	1.71439	0.0848338	0.0752735	344.323	29.5899	62.3888	7.81779	33.0548	7.19568	2.30124	7.3147	1.10918	6.5775	1.27514
DSDP Leg 74 525 A 59 1W 110-119 (80060944)	DSDP 525	Hoernle et al. (2015)	tholeiitic	-29.0707	2.98553	72	51.738	15.5943	10.0105	0.105652	5.1981	9.20232	3.37031	0.528262	2.78922	0.348653		5	98.8853			38	401	50.5822	37.8	19.2	67.2	97	23.8	2.7	491.8	38.9	237.9	21.1	7.4	2	BDL	BDL	290	29.3	68.4	8.11	34.8	7.23	2.4	7.73	1.24	6.87	1.38
DSDP Leg 74 525 A 60 4W 88-102 (80060951)	DSDP 525	Hoernle et al. (2015)	tholeiitic	-29.0707	2.98553	72	50.3595	17.0044	7.94921	0.152505	2.51634	13.2571	3.7037	0.925926	2.8976	0.348584		7.9	99.1148		9.06457	37.5447	358.677	51.5957	47.0226	51.7571	73.203	102.81	24.449	5.83448	479.91	37.7209	259.244	20.9826	2.62014	1.90338	0.0626011	0.0739273	352.749	29.9364	64.5204	8.12754	34.6622	7.69988	2.50474	7.91939	1.21679	7.28003	1.40953
DSDP Leg 74 525 A 63 2W 59-78 (80060953)	DSDP 525	Hoernle et al. (2015)	tholeiitic	-29.0707	2.98553	72.1	52.7491	15.7916	9.04822	0.134353	3.30715	7.7098	4.08227	2.284	3.19347	0.692435		2.9	98.9924		7.74409	27.0067	327.058	38.0889	38.8857	28.6685	42.0928	111.849	26.8977	23.4526	448.355	49.3843	383.466	29.9651	1.70081	2.59317	0.0737794	0.142231	531.511	50.0356	102.154	12.6525	52.253	10.8864	3.20729	10.7433	1.61599	9.46916	1.82654
DSDP Leg 74-525A-55R-3-43-49	DSDP 525	Salter et al.. (2010)	tholeiitic	-29.0707	2.9853	72	48.7304	15.3565	11.9642	0.121877	4.45866	12.3096	3.38208	0.629697	2.69145	0.355474		7.98	100		14.3									3.9	517	41	236	25				0.06	470	28	62	8.4	35	7.9	2.62	8.3	1.26	7.5	1.52
DSDP Leg 74-525A-56R-2-128-132	DSDP 525	Salter et al.. (2010)	tholeiitic	-29.0707	2.9853	72	49.6182	14.3948	12.5827	0.162883	5.65001	11.2186	2.94207	0.631172	2.46361	0.335946		6.78	100		13.6									4.8	467	38	251	25				0.07	326	28	62	7.8	32.3	7.3	2.39	7.5	1.14	6.6	1.34
DSDP Leg 74-525A-56R-4-82-85	DSDP 525	Salter et al.. (2010)	intermediate	-29.0707	2.9853	72													0		11.3									8.3	406	31	233	27				0.07	351	25	60	8.7	36	7.8	2.64	8.3	1.24	6.9	1.37
DSDP Leg 74-525A-56R-5-25-30	DSDP 525	Salter et al.. (2010)	tholeiitic	-29.0707	2.9853	72	51.4579	14.5789	11.4802	0.142233	5.2931	9.95631	3.25104	0.975312	2.52972	0.335264		3.09	100		11									17.9	466	38	255	24				0.08	371	30	63	8.1	33.4	7.4	2.44	8	1.18	6.5	1.3
DSDP Leg 74-525A-57R-1-90-95	DSDP 525	Salter et al.. (2010)	intermediate	-29.0707	2.9853	72	51.2826	15.8268	10.4025	0.131806	4.63348	9.89557	3.55875	1.19639	2.68681	0.385278		4.22	100		9.8									18	376	31	210	26				0.04	310	25	54	8.3	33.7	7.5	2.44	8	1.18	6.7	1.32
DSDP Leg 74-525A-57R-4-144-148	DSDP 525	Salter et al.. (2010)	tholeiitic	-29.0707	2.9853	72	51.1001	14.9346	11.6395	0.172361	5.2114	9.56099	3.32556	1.07472	2.62598	0.354862		3.28	100		9.2									17.8	431	38	231	25				0.04	345	28	61	8.2	33.7	7.5	2.45	8.1	1.23	7	1.42
DSDP Leg 74-525A-57R-6-33-41	DSDP 525	Salter et al.. (2010)	intermediate	-29.0707	2.9853	72	55.425	19.7548	7.02057	0.0303921	1.77287	6.70651	4.38659	0.871239	3.54574	0.486273		5.47	100		19.7									6.5	546	40	292	33				0.11	381	35	75	11	44.4	9.6	3.17	9.3	1.32	7.3	1.41
DSDP Leg 74-525A-58R-3-118-123	DSDP 525	Salter et al.. (2010)	tholeiitic	-29.0707	2.9853	72	51.4283	15.5434	10.8671	0.121988	4.74738	9.95222	3.50717	0.620108	2.80573	0.406628		5.1	100		17									3.6	435	43	246	26				0.08	276	31	68	9.5	39.2	8.7	2.78	9.2	1.37	8	1.63
DSDP Leg 74-525A-58R-5-113-117	DSDP 525	Salter et al.. (2010)	tholeiitic	-29.0707	2.9853	72	51.926	15.1946	10.4482	0.132127	4.95985	10.1331	3.36416	0.579327	2.85598	0.406545		4.58	100		17.2									3.5	461	48	267	25				0.09	299	33	70	9.1	36.6	8.3	2.62	8.9	1.34	8	1.62
DSDP Leg 74-525A-59R-1-98-103	DSDP 525	Salter et al.. (2010)	tholeiitic	-29.0707	2.9853	72	52.2755	16.1926	10.6258	0.101585	4.70337	8.49248	3.54531	0.619667	3.00691	0.436814		5.3	100		18.9									4.5	446	47	248	26				0.12	300	32	68	9.6	38.6	8.7	2.8	9.5	1.45	8.3	1.74
DSDP Leg 74-525A-59R-5-21-25	DSDP 525	Salter et al.. (2010)	tholeiitic	-29.0707	2.9853	72	54.8436	16.6414	7.80443	0.0809799	3.50238	9.21146	3.7352	0.738941	3.00638	0.435267		4.28	100		17.3									5.4	442	40	234	27				0.11	320	31	65	9.7	40	8.7	2.83	9.6	1.43	8.1	1.68
DSDP Leg 74-525A-60R-1-99-105	DSDP 525	Salter et al.. (2010)	tholeiitic	-29.0707	2.9853	72	52.4434	16.1638	10.0782	0.101595	4.89688	8.83877	3.55583	0.629889	2.91578	0.375902		4.13	100		16									4	441	43	258	27				0.07	302	30	65	9.2	37.5	8.4	2.72	9	1.39	8	1.61
DSDP Leg 74-525A-60R-4-40-46	DSDP 525	Salter et al.. (2010)	intermediate	-29.0707	2.9853	72	52.6039	15.7751	11.5381	0.0910102	5.24826	5.49095	4.16625	1.28426	3.12468	0.67752		5.82	100		18.1									11.1	418	42	293	35				0.19	371	42	86	13.5	53.4	11.2	3.41	11.7	1.68	9.3	1.84
DSDP Leg 74-525A-62R-1-109-114	DSDP 525	Salter et al.. (2010)	tholeiitic	-29.0707	2.9853	72	53.1616	15.6094	11.3838	0.0814581	5.28459	5.45769	3.93035	1.25242	3.09541	0.743305		6.53	100		20.7									14.7	547	60	407	31				0.29	419	51	114	13.7	54.5	11.4	3.34	12.7	1.84	10.3	2.06
DSDP Leg 74-525A-62R-2-58-63	DSDP 525	Salter et al.. (2010)	tholeiitic	-29.0707	2.9853	72	52.4362	15.6139	10.8433	0.111891	4.94355	7.00844	3.88567	1.33252	3.08209	0.742549		6.51	100		11.6									5.4	187	37	100	5.9				0.16	50	6.2	15	2.3	11.6	3.9	1.43	4.5	0.87	6	1.29
DSDP Leg 74-525A-63R-1-125-129	DSDP 525	Salter et al.. (2010)	intermediate	-29.0707	2.9853	72	54.1971	16.1294	9.10381	0.111517	3.57867	6.81265	4.13625	2.11882	3.21371	0.598135		1.41	100		9.7									18.1	377	33	282	37				0.12	429	35	79	12.8	50.3	10.5	3.26	10.9	1.58	8.4	1.63
DSDP Leg 74-525A-63R-1-26-33	DSDP 525	Salter et al.. (2010)	intermediate	-29.0707	2.9853	72	50.5587	19.2706	10.0264	0.101585	5.28241	6.85697	3.46404	0.924421	2.97643	0.538399		4.66	100		21.2									5.5	385	33	250	33				0.09	574	32	75	11.9	47.9	10.1	3.16	10.2	1.47	8	1.57
DSDP Leg 74-525A-63R-2-112-118	DSDP 525	Salter et al.. (2010)	intermediate	-29.0707	2.9853	72	51.7788	15.5113	11.049	0.142305	5.20431	8.49766	3.46615	0.803009	3.01891	0.528563		4.36	100		22.1									6.8	392	34	273	35				0.23	325	33	74	12	47.8	10	3.11	10.3	1.48	8.1	1.59
DSDP Leg 74-525A-63R-2-59-64	DSDP 525	Salter et al.. (2010)	tholeiitic	-29.0707	2.9853	72	53.5404	16.0834	9.69047	0.101153	4.3597	6.50415	4.15739	1.83087	3.16609	0.566458		2.64	100		5									9.7	396	28	182	20				0.1	135	16	39	5.5	25.1	6.3	2.1	6.3	0.97	5.3	1.02
(SIO Argo) CIR(C) 139D-2	Walvis Ridge	Hoernle et al. (2015)	tholeiitic	-26.45	5.883	78.37	49.1568	16.658	10.8181	0.124159	5.13192	10.7708	2.89705	0.796689	2.1314	0.310398		3.1	98.7953		22.9194	31.9264	294.525	92.2253	50.9963	73.502	62.7259	121.736	21.3683	15.0809	492.613	25.2189	145.901	14.7398	0.618856	1.30296	0.15333	0.525434	208.098	20.2265	43.2359	5.61518	24.1364	5.52126	1.87907	5.60745	0.845736	4.94046	0.932732
(SIO Argo) CIR(C) 139D-3	Walvis Ridge	Hoernle et al. (2015)	tholeiitic	-26.45	5.883	78.62	49.8197	16.9912	9.90197	0.123648	4.70891	11.2416	2.81298	0.927357	2.10201	0.267903		2.7	98.8973		17.1853	31.9084	292.216	90.2986	45.3095	50.4704	140.155	118.703	22.0137	18.872	470.179	23.6296	158.862	14.504	0.66327	1.31752	0.170637	0.738944	242.825	18.4345	40.8687	5.36196	23.6027	5.40653	1.87918	5.42999	0.816987	4.78643	0.8976
AII-93-21-1	Walvis Ridge	Rohde et l. (2013)	tholeiitic	-25.4351	6.70347	57.63	47.4434	16.7025	14.8261	0.0922226	3.41223	8.00287	3.10483	1.75223	2.44902	0.563582		2.99	98.349		17.0081	43.6885	362.312	24.4946	25.1107	44.4978	208.527	145.775	22.777	36.0489	387.691	32.4709	189.4	16.5982	0.723412	1.46868	4.07975	1.3087	169.326	18.7759	41.7452	5.75351	25.4337	6.15596	2.10375	6.56073	1.04885	6.30501	1.22324
CH19 DR3-2	Walvis Ridge	Hoernle et al. (2015)	tholeiitic	-19.3717	9.3334	114.1	48.1729	16.8296	14.3375	0.257334	1.87339	5.54812	3.36593	3.75708	3.70561	0.555841		2.5	98.4034		26.3994	38.4583	595.946	71.6846	32.5852	50.9238	290.657	249.423	26.632	52.8049	322.34	37.3002	323.309	24.127	1.77241	2.48056	1.902	0.476214	338.156	29.8258	61.5802	8.73449	38.1216	9.11714	2.93629	9.10412	1.35915	7.79064	1.43925
CH19 DR3-22	Walvis Ridge	Hoernle et al. (2015)	tholeiitic	-19.3717	9.3334	108.3	49.004	17.9275	9.95329	0.169527	7.72409	8.19029	2.83958	1.67408	1.27146	0.137741		5.3	98.8916			29	199	340.451	27.7	131.4	46.6	92	15.4	15.5	304.3	15.2	76.8	5.8	0.9	BDL	BDL	BDL	141	8.7	20.8	2.59	12.1	3.02	1.13	3.16	0.52	3.01	0.57
CH19 DR4-03	Walvis Ridge	Hoernle et al. (2015)	tholeiitic	-19.8468	9.01667	112.08	52.9289	18.8764	8.42214	0.0625391	2.82468	7.48384	3.47092	1.87617	2.73087	0.385658		3.8	99.0621		42.409	37.086	330.922	178.291	31.8244	46.5524	81.2476	218.964	22.9982	20.6071	438.151	30.4544	247.128	22.4614	1.07013	1.79965	0.369445	0.0824187	305.52	27.1606	58.6544	7.55871	31.528	6.96338	2.41097	6.80541	1.02377	5.93864	1.13112
CH19 DR4-1	Walvis Ridge	Hoernle et al. (2015)	tholeiitic	-19.8468	9.01667	112.18	53.7109	16.3195	9.16472	0.157019	3.17178	7.77766	3.75798	1.03632	3.44394	0.439652		4.2	98.9794		291.812	38.5087	430.183	54.1483	43.0299	27.9583	40.7408	153.831	24.9666	12.2616	395.4	45.1352	309.16	23.8057	1.33627	2.33723	0.14703	0.133876	289.027	32.4103	70.351	9.34193	40.5813	9.53624	3.08716	9.72582	1.49571	8.81878	1.694
CH19 DR4-2	Walvis Ridge	Hoernle et al. (2015)	tholeiitic	-19.8468	9.01667	112.4	53.1042	18.4479	8.74493	0.0729167	2.53125	7.72917	3.42708	1.8125	2.76042	0.395833		3.7	99.0262		29.7216	36.6776	320.957	168.268	27.0067	45.0478	36.9816	164.332	22.9657	21.0664	406.386	32.0895	253.124	22.2504	1.00237	1.85556	0.434944	0.090757	308.694	26.0464	57.2141	7.37782	31.5478	6.95771	2.46062	6.89973	1.06446	6.24154	1.18269
CH19 DR4-3	Walvis Ridge	Hoernle et al. (2015)	tholeiitic	-19.8468	9.01667	112.6	53.0488	19.088	8.46062	0.0941324	2.56249	7.1436	3.51428	1.97678	2.77168	0.397448		4.1	99.0578			36	343	193.104	35	40.9	41.1	229	21.2	19.5	422.9	28.3	223.9	22.4	0.5	2	0.1	BDL	294	25.3	59.3	7.03	30.5	6.68	2.35	6.45	1.02	5.61	1.08
CH19 DR4-H2	Walvis Ridge	Hoernle et al. (2015)	tholeiitic	-19.8468	9.01667	112.6	52.9803	18.7559	8.6395	0.0936232	2.38219	7.69791	3.37044	1.96609	2.73588	0.416103		3.6	99.0379			38	343	184.948	27.6	28.1	10.4	129	22.5	24.4	433.2	34.7	236.4	22.9	0.2	2	BDL	BDL	306	26.9	62.4	7.65	33.6	6.66	2.33	7.04	1.1	5.97	1.23
SO233 DR15-1	Walvis Ridge	Homrighausen et al. (2019)	tholeiitic	-28.6015	3.13833	70.8016	48.9957	17.3499	10.8072	0.112728	4.91904	11.1908	2.46977	0.87108	1.83439	0.245952	0.010247	2.43	98.7965		11.7032	34.218	300.343	1120.3	22.9857	207.024	103.64	98.9905	21.3355	7.44957	335.379	24.6772	129.635	7.90189	0.699672	1.1163	1.32848	0.134606	80.2739	11.9699	24.6022	4.03532	18.771	4.78837	1.7123	5.07408	0.817118	4.82188	0.932638
SO233 DR32-1	Walvis Ridge	Homrighausen et al. (2019)	tholeiitic	-26.4907	3.15486	76.8629	49.7883	16.4378	11.0187	0.113578	5.10067	10.2426	2.68456	1.08415	2.03407	0.268456	0	3.61	98.773		25.7238	43.7342	280.255	174.908	28.9163	51.9326	126.978	105.25	20.3131	18.4798	293.198	28.4893	146.587	10.5026	0.422315	1.24058	1.55872	0.759352	135.968	13.7575	31.6841	4.19748	19.187	4.91397	1.7409	5.37902	0.89166	5.4072	1.07657
SO233 DR37-1A	Walvis Ridge	Homrighausen et al. (2019)	tholeiitic	-26.8457	4.93764	79.41	47.0536	19.19	10.6244	0.121386	0.706246	9.8102	3.67469	3.35467	3.17811	1.10351	0.0425306	6.16	98.8169		28.6207	34.3965	228.325	65.5994	22.3815	45.6914	72.8761	155.199	25.3742	31.5896	503.953	34.6602	193.612	23.4499	1.03866	1.58097	3.50926	1.11685	218.229	27.4612	57.1194	7.70339	33.7875	7.67491	2.65459	7.787	1.19385	6.90396	1.30634
SO233 DR39-1	Walvis Ridge	Homrighausen et al. (2019)	tholeiitic	-26.5111	5.18708	80.9191	47.612	19.9234	13.017	0.0957345	2.1168	7.76513	2.97841	1.64876	2.51037	0.882885	0	2.41	98.5505		155.167	38.129	446.216	33.5364	44.3043	25.6621	63.5711	181.55	24.4957	16.2583	370.39	41.4644	253.7	20.708	0.889065	2.2689	0.44598	0.818903	232.31	24.3896	59.5235	8.09519	36.9546	9.1356	3.0432	9.25205	1.45517	8.45333	1.60423
SO233 DR40-1	Walvis Ridge	Homrighausen et al. (2019)	alkaline	-26.824	5.61306	81.7	49.7651	15.7532	11.0937	0.104395	4.83349	9.21808	2.92306	1.59724	2.55768	0.918676	0.0210261	3.98	98.7646		19.6983	12.4167	120.243	4.94011	4.52108	25.4487	27.6006	151.082	25.4934	71.0187	580.958	59.3505	504.99	91.6645	2.02917	3.07385	6.39308	0.468975	1568.32	88.8204	170.18	20.1569	76.9276	13.7205	4.35869	12.2686	1.83557	10.547	2.10209
SO233 DR41-1	Walvis Ridge	Homrighausen et al. (2019)	alkaline	-26.8354	5.66583	81.31	53.3713	18.7929	9.51355	0.137174	0.717527	4.69558	4.2313	4.63227	1.79382	1.05519	0.0219154	8.84	98.9406		16.7768	32.1394	149.051	236.195	11.3473	46.5748	95.1745	117.206	18.0079	55.6476	587.188	29.0117	227.708	49.7374	0.881649	1.42611	3.44917	1.34963	654.45	42.609	78.222	9.15241	35.2296	6.49198	2.11799	6.0221	0.902207	5.20777	1.01913
SO233 DR43-1	Walvis Ridge	Homrighausen et al. (2019)	tholeiitic	-26.7233	4.95167	78.8	49.0823	20.8204	11.0535	0.0442282	1.90181	6.80009	2.35515	2.88589	2.72004	1.10571	0	5.68	98.7691		77.3178	36.8335	241.966	1043.27	44.2753	417.997	80.5054	185.645	15.8951	9.87117	247	23.8471	117.463	11.0764	0.394883	0.942404	0.448156	0.832439	143.763	14.4664	30.0738	4.1708	18.7248	4.47032	1.52916	4.66417	0.732284	4.32565	0.840273
SO233 DR43-3	Walvis Ridge	Homrighausen et al. (2019)	tholeiitic	-26.7233	4.95167	78.84	48.6797	13.5434	9.95413	0.127768	11.1478	10.7751	1.92717	0.692078	1.78876	0.255537	0.0103853	3.65	98.8915		28.5592	32.5388	223.516	87.742	29.1855	48.1878	128.451	108.715	21.6764	14.0405	421.12	39.019	201.299	19.1097	0.669308	1.63546	1.78692	0.404698	317.329	28.9331	50.0324	7.00871	30.2074	6.74758	2.23318	6.98082	1.07293	6.38618	1.24799
SO233 DR43-6	Walvis Ridge	Homrighausen et al. (2019)	intermediate	-26.7233	4.95167	78.84	49.7818	17.3177	10.3104	0.0934968	3.95803	9.53667	3.21006	1.42323	2.18159	1.03885	0	2.69	98.8519		32.8549	32.6485	293.524	114.996	37.2243	70.2796	50.9907	127.255	22.1712	30.8566	408.928	28.3415	210.581	27.8912	1.04851	1.62814	0.315376	0.777646	392.051	29.1621	61.9464	7.69675	31.9862	6.73082	2.21427	6.47447	0.98353	5.61549	1.06989
SO233 DR62-1	Walvis Ridge	Hoernle et al. (2015)	tholeiitic	-25.8508	6.61583	83.85	51.5476	13.6456	11.7231	0.212422	5.088	9.74105	2.66033	0.97107	2.73113	0.364151	0.0101153	1.46	98.6844		9.27476	36.9578	403.934	57.2562	40.1976	47.5163	217.672	114.981	22.7372	18.8016	368.853	36.0807	226.987	20.8291	0.99263	1.8515	0.0485707	0.272416	305.873	26.4411	58.1254	7.46073	32.6175	7.52259	2.44734	7.5641	1.18332	6.97092	1.35097
SO233 DR66-1	Walvis Ridge	Hoernle et al. (2015)	tholeiitic	-22.7217	7.57875	97.3519	50.0516	16.0301	9.60356	0.123865	5.96614	10.9723	2.55987	0.928984	2.21924	0.464492	0.010322	3.42	98.9202		37.6924	32.1687	247.477	309.047	35.2029	106.728	58.6924	119.612	19.9963	14.14	405.067	28.4534	153.539	19.527	0.525094	1.33625	0.535418	0.818893	189.344	20.4369	40.0616	5.25129	22.9539	5.41334	1.86216	5.67297	0.890052	5.23078	1.01026
SO233 DR71-1	Walvis Ridge	Hoernle et al. (2015)	intermediate	-22.6736	5.12681	92.4608	47.7336	20.8378	11.7525	0.075188	3.66273	8.45328	2.80344	1.12782	1.86896	0.365199	0.0107411	6.49	98.6805		50.1093	34.1185	164.215	572.029	30.267	171.485	206.866	175.579	16.5542	21.2833	471.608	33.5442	134.245	27.6234	0.493775	1.20766	4.99382	0.980124	263.385	26.933	42.9208	6.11296	26.1326	5.7868	1.98376	6.15594	0.958064	5.80881	1.16957
SO233 DR84-1	Walvis Ridge	Homrighausen et al. (2019)	tholeiitic	-20.3471	7.64028	109	52.7001	19.1444	6.72659	0.338839	5.69674	5.53791	3.28251	3.12368	2.36129	0.338839	0	4.73	99.2509		27.1241	26.8879	248.367	53.9589	21.156	40.2411	112.181	2297.3	21.0772	58.4946	394.285	28.3131	223.907	20.0971	0.893548	1.56966	0.0530545	0.286894	455.494	23.1731	51.778	6.61978	28.6437	6.40537	2.20732	6.28504	0.968369	5.60313	1.07273
SO233 DR84-2	Walvis Ridge	Hoernle et al. (2015)	tholeiitic	-20.3471	7.64028	109	51.7176	18.6008	9.36742	0.0942606	5.22623	5.05865	3.90658	2.84876	1.90616	0.230415	0	4.3	98.9569		40.7274	25.3632	199.465	162.456	25.0703	68.6416	56.0648	212.71	19.9452	45.8531	317.634	20.247	164.499	13.2704	0.579599	1.35414	0.303198	0.38999	418.09	17.9201	38.6367	4.99514	21.9673	5.12381	1.89588	5.03744	0.772923	4.32912	0.791655
SO233 DR-19-1-A	Walvis Ridge	Homrighausen et al. (2019)	intermediate	-28.4444	3.6603	70.97	46.1947	14.9235	10.4919	0.170068	12.9145	9.51318	1.66879	1.08418	1.57313	0.297619	0.175543	6.78	98.8316		41.1855	25.5721	284.987	95.9402	10.4512	34.5779	64.3018	227.292	24.0299	22.9539	2898.03	52.5979	411.895	51.3281	1.70461	2.66999	8.89046	0.636214	857.863	59.9081	121.788	14.6626	60.0643	12.0929	3.89168	11.3316	1.65685	9.43533	1.79802
SO233 DR-29-1	Walvis Ridge	Homrighausen et al. (2019)	tholeiitic	-26.2792	3.0406	77.2285	50.0571	16.0175	11.3375	0.124649	5.59884	9.83692	2.67996	1.12184	1.70354	0.259686	0	3.56	98.7375		27.6877	49.9294	315.001	67.8881	34.1482	44.1447	133.559	174.743	19.4879	18.636	235.306	29.6897	115.386	9.57314	0.567164	1.07359	2.54478	0.845027	92.8297	13.6404	27.4045	3.72415	16.8698	4.43536	1.55614	5.1686	0.869484	5.52728	1.13097
SO233 DR-29-6	Walvis Ridge	Homrighausen et al. (2019)	tholeiitic	-26.2792	3.0406	77.2285	44.9009	17.613	16.9401	0.0556669	1.55867	7.9047	2.77221	2.71654	2.53841	1.11334	0.133325	8	98.1136		18.1678	51.3872	416.889	63.5696	13.7969	38.5492	237.759	276.033	22.4794	35.0617	272.762	74.2445	177.956	13.7147	1.63118	1.6108	6.49242	1.07556	108.025	31.5371	40.4681	6.64161	29.7701	7.42523	2.41618	9.13387	1.52039	10.118	2.18378
SO233 DR-32-2	Walvis Ridge	Homrighausen et al. (2019)	tholeiitic	-26.4903	3.1564	76.8629	50.5856	17.456	9.69537	0.091659	4.40982	10.4797	3.07567	1.19157	1.73134	0.203687	0	1.8	98.9203		15.6032	41.1676	389.837	162.862	30.2921	33.2844	42.3737	84.6427	22.179	23.5113	263.083	21.2008	135.397	8.59302	0.682177	1.10772	0.456425	0.383315	148.327	12.4587	25.1303	3.45717	15.6768	3.92924	1.53694	4.36081	0.696055	4.24865	0.835266
SO233 DR-35-1	Walvis Ridge	Homrighausen et al. (2019)	tholeiitic	-26.2231	3.3211	75.4	50.8185	16.7919	9.34725	0.123546	4.95213	10.7794	2.92392	0.772161	2.17235	0.277978	0	2.17	98.9591		21.2992	49.3073	288.559	221.363	27.9799	55.6079	131.944	107.596	21.909	11.9056	295.317	36.7787	166.484	10.5045	0.349909	1.40624	0.517329	0.451036	130.402	16.8996	35.7037	4.95997	23.05	5.95887	2.0297	6.67018	1.0931	6.84252	1.37403
SO233 DR-35-10	Walvis Ridge	Homrighausen et al. (2019)	tholeiitic	-26.2231	3.3211	75.4	50.2042	16.2888	9.40967	0.132761	5.26961	11.5911	2.83905	1.00082	1.98121	0.234886	0	2.1	98.9522		19.7674	43.5223	310.831	251.892	45.6498	61.5672	81.3209	102.635	20.5919	20.41	278.749	30.5678	151.2	9.56205	0.519951	1.21106	1.10924	0.641199	168.766	14.029	31.6267	4.30535	20.0415	5.23217	1.82155	5.78938	0.939691	5.8342	1.16605
SO233 DR-35-12	Walvis Ridge	Homrighausen et al. (2019)	tholeiitic	-26.2231	3.3211	75.4	49.0306	15.2551	11.2291	0.183673	6.28571	11.5408	2.53061	0.459184	2	0.234694	0	2.02	98.7495		24.8233	46.6348	356.913	259.73	54.5503	75.9576	106.241	110.75	20.1579	7.75803	271.354	31.5644	148.861	9.58243	0.583673	1.29865	0.35197	0.474222	101.155	14.3839	31.9278	4.4969	20.9315	5.43255	1.86975	6.05845	0.983492	6.10969	1.22001
SO233 DR-35-14	Walvis Ridge	Homrighausen et al. (2019)	tholeiitic	-26.2231	3.3211	75.4	49.9644	15.4104	10.2418	0.16275	5.98108	11.3824	2.72607	0.732377	2.01404	0.244126	0	1.48	98.8595		18.1554	47.3873	322.102	251.999	43.4365	69.0104	103.373	104.551	20.243	9.84449	270.887	32.9801	147.249	9.63844	0.460069	1.31174	0.850311	0.425242	150.52	14.994	32.2492	4.48735	21.0599	5.45501	1.88724	6.13769	1.00742	6.28112	1.26359
SO233 DR-35-3	Walvis Ridge	Homrighausen et al. (2019)	tholeiitic	-26.2231	3.3211	75.4	49.744	15.3082	11.4433	0.163834	5.42699	10.9871	2.62134	0.675814	2.1196	0.235511	0	1.71	98.7257		14.5375	46.0674	337.575	128.994	33.9728	51.8094	118.404	101.685	21.0024	14.134	236.692	30.9757	169.787	10.8162	0.505192	1.41401	0.265506	0.567227	105.866	12.5779	33.8734	4.30918	20.1651	5.41578	1.85003	6.02354	1.00567	6.25616	1.25222
SO233 DR-35-4	Walvis Ridge	Homrighausen et al. (2019)	tholeiitic	-26.2231	3.3211	75.4	48.6509	16.7044	11.1479	0.15448	5.21112	11.3697	2.49228	0.906282	1.81256	0.30896	0	2.74	98.7586		29.788	45.3243	340.863	274.891	35.9416	55.3867	100.529	117.617	21.2946	18.2872	259.323	31.6124	137.73	9.01522	0.58698	1.19764	0.695136	0.854031	87.3202	13.6877	30.1126	4.10372	19.058	5.00209	1.72572	5.6764	0.936992	5.90247	1.1901
SO233 DR-35-5	Walvis Ridge	Homrighausen et al. (2019)	tholeiitic	-26.2231	3.3211	75.4	49.6898	15.5325	11.7337	0.16275	5.13681	10.65	2.7871	0.793409	1.95301	0.254298	0	1.66	98.6934		8.70937	46.2814	340.23	176.445	33.4837	44.8673	140.02	104.207	20.5346	13.8648	270.775	31.4382	141.338	8.26018	0.582541	1.19898	0.787473	0.507815	116.2	12.6474	28.3988	4.02867	19.1624	5.1281	1.76842	5.73645	0.953555	5.95753	1.19151
SO233 DR-39-20	Walvis Ridge	Homrighausen et al. (2019)	tholeiitic	-26.5075	5.1856	80.9191	49.2516	14.6196	13.2839	0.194792	4.28542	8.8579	3.0449	0.994464	3.48575	0.502358	0	3.83	98.5207		30.1659	34.5749	269.631	192.24	37.6318	55.9774	92.3475	143.783	21.4406	19.9192	347.452	29.7415	176.597	14.3773	0.772182	1.55807	1.21736	0.918075	150.562	18.1286	39.4563	5.47214	25.1391	6.22256	2.1229	6.52889	1.01129	5.95794	1.14044
SO233 DR-39-21	Walvis Ridge	Homrighausen et al. (2019)	tholeiitic	-26.5075	5.1856	80.9191	49.7085	16.3994	12.339	0.0832986	4.55019	8.35069	3.00916	1.33278	2.49896	0.354019	0.0211357	3.74	98.626		27.736	42.0093	319.103	153.12	36.8768	54.8158	119.229	186.725	21.2925	32.5067	352.958	33.7256	189.82	16.0773	0.827125	1.71166	0.772987	1.11192	169.318	20.9274	42.1584	6.1244	28.4362	7.00886	2.39228	7.34246	1.11903	6.53121	1.24512
SO233 DR-39-3	Walvis Ridge	Homrighausen et al. (2019)	tholeiitic	-26.5075	5.1856	80.9191	49.3165	14.3134	13.6687	0.193838	4.28484	8.97776	2.93818	0.86717	3.44828	0.469292	0	2.39	98.4779		119.585	41.6502	474.001	34.8135	47.7673	29.3357	66.7327	221.561	24.2298	17.882	361.345	41.6694	260.28	21.472	1.05328	2.29587	0.638836	0.836212	263.252	26.0833	59.9284	8.55709	39.2687	9.7089	3.15453	9.82411	1.52648	8.96147	1.68823
SO233 DR-4-1	Walvis Ridge	Homrighausen et al. (2019)	intermediate	-32.9269	1.4908	59.17	47.6643	16.6772	10.7364	0.327626	3.56161	9.91334	3.31854	2.30395	3.24456	1.05686	0.0844963	3.43	98.8044		23.0146	21.9583	256.23	128.624	45.6143	146.147	71.1728	166.294	25.6127	38.8166	785.037	58.9345	367.1	52.2031	2.94905	2.51668	1.39953	0.561115	735.673	81.7048	125.103	17.1523	69.7531	13.2248	3.92373	12.386	1.73214	9.65447	1.84254
SO233 DR-41-2	Walvis Ridge	Homrighausen et al. (2019)	intermediate	-26.835	5.6678	81.31	48.3889	19.772	9.21102	0.0548005	1.60018	11.1026	2.46602	3.15651	2.41122	0.811048	0.055818	8.5	98.9743		35.2144	36.6989	194.679	421.007	6.7068	47.4837	111.684	161.557	17.9307	48.1145	579.638	52.0363	247.085	55.3629	0.97043	1.61523	7.56714	1.67764	629.809	66.8927	84.1989	12.0939	47.3158	8.38716	2.65116	8.58596	1.22657	7.33365	1.50539
SO233 DR-64-1	Walvis Ridge	Homrighausen et al. (2019)	tholeiitic	-25.3719	6.7239	87.28	47.5969	16.5216	13.6918	0.124301	4.133	9.17754	2.62068	1.45018	2.30992	0.424694	0	3.92	98.0506		19.0478	44.5098	384.82	92.1121	25.6263	49.2778	210.895	115.614	23.2417	27.0979	377.631	30.2125	170.419	13.2212	0.632424	1.41785	2.81696	0.86359	144.339	18.4625	40.2629	5.41946	24.4724	5.96284	2.06115	6.24981	0.986861	5.91381	1.15049
SO233 DR-66-2	Walvis Ridge	Homrighausen et al. (2019)	tholeiitic	-22.7183	7.5736	96.687	47.7999	16.5921	13.7502	0.124831	4.15063	9.21669	2.63185	1.45636	2.31978	0.426506	0	3.38	98.4688		38.9587	34.7202	271.292	326.162	33.8935	97.8942	59.5135	122.968	19.8971	17.3685	398.402	27.3415	154.898	19.3905	0.542904	1.37185	0.388626	0.961275	192.935	20.2358	39.0415	5.27148	23.2133	5.53006	1.88684	5.78545	0.894839	5.30674	1.01296
SO233 DR-66-3	Walvis Ridge	Homrighausen et al. (2019)	tholeiitic	-22.7183	7.5736	96.687	50.1193	16.0357	9.58505	0.124468	6.08858	10.6939	2.56197	1.14096	2.26118	0.321543	0	3	98.9326		37.6493	33.8117	268.107	333.153	32.783	104.909	61.1484	115.692	20.2339	16.2079	411.338	29.3114	157.521	19.778	0.548627	1.36708	0.412667	0.880658	221.46	22.0458	40.5339	5.56042	24.5442	5.80227	1.94355	6.06131	0.9328	5.54443	1.06472
SO233 DR28-1	Walvis Ridge	Homrighausen et al. (2019)	tholeiitic	-26.3103	3.05167	77.1597	50.7118	14.7308	14.1829	0.195998	4.05405	5.94182	4.29131	1.88777	2.13534	0.288838	0	3.08	98.4206		31.1756	40.5215	374.067	12.2407	41.6094	28.8764	70.269	146.128	21.808	32.902	275.969	40.8303	179.545	14.1617	0.482877	1.5554	1.221	1.16328	329.617	19.1073	42.089	5.34665	23.6432	6.0327	1.97121	6.82005	1.18254	7.53331	1.55372
SO233 DR28-3	Walvis Ridge	Homrighausen et al. (2019)	tholeiitic	-26.3103	3.05167	77.1597	49.0352	16.376	13.3703	0.154783	4.39583	9.08059	2.79641	1.22794	1.82644	0.247652	0.0103178	3.31	98.5111		39.6137	51.5538	416.863	37.6248	37.8555	48.551	114.29	152.1	22.3841	40.7248	217.569	33.3746	132.738	9.94748	0.653745	1.1664	1.5531	2.75843	103.45	12.0284	27.6341	3.82971	17.5857	4.82275	1.67657	5.54459	0.972486	6.25329	1.2824
SO233 DR34-1A	Walvis Ridge	Hoernle et al. (2015)	tholeiitic	-26.2939	3.47028	75	50.103	16.1038	11.9887	0.123558	4.36573	9.84349	2.79036	0.875206	2.20346	0.257414	0.0102965	3.2	98.6547		14.0082	46.0966	317.342	174.598	36.4031	42.1093	59.9447	119.984	21.9764	19.8697	283.976	37.6884	167.493	11.3043	0.542275	1.48627	0.326992	0.780695	115.511	16.5704	39.5673	5.26693	24.1141	6.26164	2.13209	6.92038	1.15748	7.08152	1.41711
SO233 DR62-2_LA	Walvis Ridge	Homrighausen et al. (2019)	tholeiitic	-25.8508	6.61583	84.2	51.3906	12.5066	14.2714	0.229292	4.69281	9.13089	3.11045	1.0834	3.20495	0.367724	0.0118492		99.9882		8.08922	36.9951	440.592	8.15985	42.7393	26.7396	289.65	161.753	23.6403	22.5097	329.276	40.521	245.948	24.132	1.19168	2.49877	0.0423714	0.169652	335.413	28.1846	61.5968	8.04552	34.9607	8.11012	2.56193	8.46011	1.27957	7.63311	1.47596
V29-11-1	Walvis Ridge	Hoernle et al. (2015)	tholeiitic	-26.15	5.5833	83.1633	55.1688	15.9242	12.2626	0.11639	4.15829	0.984023	4.51804	0.613692	4.27468	0.613692		5.3	98.6345		41.0071	38.1977	397.961	12.0117	19.1776	41.0349	68.4388	108.653	25.1549	9.81284	130.526	42.6142	317.791	28.7295	1.54652	2.72229	2.20875	0.418806	129	43.8205	86.3116	11.5952	48.434	10.3397	3.41261	9.72296	1.4121	8.21265	1.60117
Walvis III DR04-35	Walvis Ridge	Hoernle et al. (2015)	tholeiitic	-27.2583	4.39167	66.84	48.3878	18.9302	12.9215	0.128123	2.47704	7.52723	3.37391	1.64425	2.17809	0.992953		6.1	98.5611		22.8405	39.29	226.595	202.166	27.7312	47.1679	109.994	155.843	20.7494	27.3166	425.416	50.373	179.462	14.2215	1.24162	1.53972	4.27138	0.860867	201	27.3461	38.6505	6.518	28.753	6.92137	2.28764	7.91334	1.23817	7.61007	1.55055
Notes:
1geochemical affinity is based on the Nb/Y ratios: Nb/Y < 0.8 tholeiitic; Nb/Y > 1.4 = alkaline
* Ages are from Homrighausen et al. (2018); Homrighausene al. (2019); O'Connor, J.M. and Jokat, W. (2015;EPSL); O'Connor, J.M. and Jokat, W. (2015 Geology); Rohde et al. . (2013) or esimated after Homrighausen et al. (2019) and this study
References
Class, C. and le Roex, A.P. (2008): Ce anomalies in Gough Island lavas — Trace element characteristics of a recycled sediment component. Earth Planet Sc Lett, 475-486. http://dx.doi.org/10.1016/j.epsl.2007.10.030
Cliff, R.A., Baker, P.E. and Mateer, N.J. (1991): Geochemistry of inaccessible island volcanics. Chem Geol, 251-260. http://dx.doi.org/10.1016/0009-2541(91)90073-Z
Ewart, A., Marsh, J.S., Milner, S.C., Duncan, A.R., Kamber, B.S. and Armstrong, R.A. (2004): Petrology and Geochemistry of Early Cretaceous Bimodal Continental Flood Volcanism of the NW Etendeka, Namibia. Part 1: Introduction, Mafic Lavas and Re-evaluation of Mantle Source Components. J Petrol, 59-105. 10.1093/petrology/egg083
Gibson, S.A., Thompson, R.N., Day, J.A., Humphris, S.E. and Dickin, A.P. (2005): Melt-generation processes associated with the Tristan mantle plume: Constraints on the origin of EM-1. Earth Planet Sc Lett, 744-767. http://dx.doi.org/10.1016/j.epsl.2005.06.015
Hoernle, K., Rohde, J., Hauff, F., Garbe-Schonberg, D., Homrighausen, S., Werner, R. and Morgan, J.P. (2015): How and when plume zonation appeared during the 132 Myr evolution of the Tristan Hotspot. Nature Communication, 10.1038/ncomms8799. https://doi.org/10.1038/ncomms8799
Homrighausen, S., Hoernle, K., Geldmacher, J., Wartho, J.A., Hauff, F., Portnyagin, M., Werner, R., van den Bogaard, P. and Garbe-Schönberg, D. (2018): Unexpected HIMU-type late-stage volcanism on the Walvis Ridge. Earth Planet Sc Lett, 251-263. https://doi.org/10.1016/j.epsl.2018.03.049
Homrighausen, S., Hoernle, K., Hauff, F., Wartho, J.-A. and Garbe-Schönberg, C.D. (2019): New age and geochemical data from the Walvis Ridge: The temporal and spatial diversity of South Atlantic intraplate volcanism and its possible origin. Geochimica et Cosmochimica Acta, 16-34. https://doi.org/10.1016/j.gca.2018.09.002.
Hoyer, P.A., Haase, K.M., Regelous, M., O’Connor, J.M., Homrighausen, S., Geissler, W.H. and Jokat, W. (2022): Mantle plume and rift-related volcanism during the evolution of the Rio Grande Rise. Communications Earth & Environment, 18. https://doi.org/10.1038/s43247-022-00349-1
Le Roex, A.P. (1985): Geochemistry, Mineralogy and Magmatic Evolution of the Basaltic and Trachytic Lavas from Gough Island, South Atlantic. J Petrol, 149-186. 10.1093/petrology/26.1.149
Le Roex, A.P., Cliff, R.A. and Adair, B.J.I. (1990): Tristan da Cunha, South Atlantic: Geochemistry and Petrogenesis of a Basanite-Phonolite Lava Series. J Petrol, 779-812. 10.1093/petrology/31.4.779
Rohde, J., Hoernle, K., Hauff, F., Werner, R., O'Connor, J., Class, C., Garbe-Schönberg, D. and Jokat, W. (2013): 70 Ma chemical zonation of the Tristan-Gough hotspot track. Geology, 335-338. https://doi.org/10.1130/G33790.1
Salters, V.J.M. and Sachi-Kocher, A. (2010): An ancient metasomatic source for the Walvis Ridge basalts. Chem Geol, 151-167. http://dx.doi.org/10.1016/j.chemgeo.2010.02.010
Sun, S.-S. (1980): Lead Isotopic Study of Young Volcanic Rocks from Mid-Ocean Ridges, Ocean Islands and Island Arcs. Philosophical Transactions of the Royal Society of London. Series A, Mathematical and Physical Sciences, 409-445.
Willbold, M. and Stracke, A. (2006): Trace element composition of mantle end-members: Implications for recycling of oceanic and upper and lower continental crust. Geochemistry, Geophysics, Geosystems, Q04004. 10.1029/2005GC001005
Willbold, M. and Stracke, A. (2010): Formation of enriched mantle components by recycling of upper and lower continental crust. Chem Geol, 188-197. http://dx.doi.org/10.1016/j.chemgeo.2010.06.005
[truncated: 35 more columns]
